# Supplementary material for: Synthesis and Bioactivity of Hydrazide-Hydrazones with the 1-Adamantyl-Carbonyl Moiety
Source: PubMed Central journal article supplement (PMC6864450; doi:10.3390/molecules24214000), 2019-11-05

## Supporting information

Article

# Synthesis and Bioactivity of Hydrazone-hydrazones of 1-Adamantyl-carbonyl Moiety

Hien Pham Van<sup>1</sup>, Dung Phan Thi Phuong<sup>2</sup>, Chau Phan Dinh<sup>3,\*</sup> and Duong Vu Binh<sup>1,\*</sup>

<sup>1</sup> Drug R&D center, Vietnam Military Medical University. No.160, Phung Hung str., Phuc La ward, Ha Dong district, Hanoi 100000, Vietnam.

<sup>2</sup> Department of Pharmaceutical Chemistry, Hanoi University of Pharmacy. No. 15, Le Thanh Tong Str., Hoan Kiem district, Hanoi 100000, Vietnam.

<sup>3</sup> Hanoi University of Science and Technology. No.1, Dai Co Viet str., Bach Khoa ward, Hai Ba Trung district, Hanoi 100000, Vietnam.

\*Correspondence: [ybduong2978@gmail.com](mailto:ybduong2978@gmail.com) and [chau.phandinh@hust.edu.vn](mailto:chau.phandinh@hust.edu.vn);

Tel.: +84 983 425 460; Fax: +84 243 688 4077.

## Table of content

|                                                                                                                                                                                                              |    |
|--------------------------------------------------------------------------------------------------------------------------------------------------------------------------------------------------------------|----|
| <b>Scheme 1.</b> Synthesis of hydrazide hydrazones <b>4a-i</b> and <b>5a-k</b> .....                                                                                                                         | 1  |
| <b>Table 1.</b> Crystal solvent (Cryst. Solv.), melting point (m.p), yield (%), molecular formulae, molecular weight (Mol. Wt.) and R <sub>f</sub> of hydrazide-hydrazones <b>4a-i</b> and <b>5a-k</b> ..... | 2  |
| <b>Table 2.</b> MIC of synthesized hydrazide-hydrazole <b>4a-i</b> and <b>5a-k</b> .....                                                                                                                     | 3  |
| <b>Table 3.</b> IC <sub>50</sub> of synthesized hydrazide-hydrazole <b>4a-i</b> and <b>5a-k</b> .....                                                                                                        | 4  |
| <b>Table 4.</b> The effect of newly synthesized hydrazide-hydrazole <b>4a-i</b> and <b>5a-k</b> on the viability of HeP3B, Hela, A549 and MCF-7 cell after 48 h of incubation .....                          | 5  |
| <sup>1</sup> H-NMR spectrum of compound <b>4a</b> .....                                                                                                                                                      | 6  |
| <sup>13</sup> C-NMR spectrum of compound <b>4a</b> .....                                                                                                                                                     | 6  |
| HMBC spectrum of compound <b>4a</b> .....                                                                                                                                                                    | 7  |
| HSQC spectrum of compound <b>4a</b> .....                                                                                                                                                                    | 7  |
| ESI-MS spectrum of compound <b>4a</b> (negative) .....                                                                                                                                                       | 8  |
| ESI-MS spectrum of compound <b>4a</b> (positive) .....                                                                                                                                                       | 8  |
| <sup>1</sup> H-NMR spectrum of compound <b>4b</b> .....                                                                                                                                                      | 9  |
| ESI-MS spectrum of compound <b>4b</b> (negative) .....                                                                                                                                                       | 9  |
| ESI-MS spectrum of compound <b>4b</b> (positive) .....                                                                                                                                                       | 10 |
| <sup>1</sup> H-NMR spectrum of compound <b>4c</b> .....                                                                                                                                                      | 10 |
| ESI-MS spectrum of compound <b>4c</b> (negative) .....                                                                                                                                                       | 11 |
| <sup>1</sup> H-NMR spectrum of compound <b>4d</b> .....                                                                                                                                                      | 11 |
| ESI-MS spectrum of compound <b>4d</b> (negative) .....                                                                                                                                                       | 12 |
| ESI-MS spectrum of compound <b>4d</b> (positive) .....                                                                                                                                                       | 12 |
| <sup>1</sup> H-NMR spectrum of compound <b>4e</b> .....                                                                                                                                                      | 13 |
| ESI-MS spectrum of compound <b>4e</b> (negative) .....                                                                                                                                                       | 13 |
| ESI-MS spectrum of compound <b>4e</b> (positive) .....                                                                                                                                                       | 14 |
| <sup>1</sup> H-NMR spectrum of compound <b>4f</b> .....                                                                                                                                                      | 14 |
| ESI-MS spectrum of compound <b>4f</b> (positive) .....                                                                                                                                                       | 14 |
| <sup>1</sup> H-NMR spectrum of compound <b>4g</b> .....                                                                                                                                                      | 15 |
| ESI-MS spectrum of compound <b>4g</b> (positive) .....                                                                                                                                                       | 15 |
| <sup>1</sup> H-NMR spectrum of compound <b>4h</b> .....                                                                                                                                                      | 16 |
| ESI-MS spectrum of compound <b>4h</b> (positive) .....                                                                                                                                                       | 16 |
| <sup>1</sup> H-NMR spectrum of compound <b>4i</b> .....                                                                                                                                                      | 17 |
| ESI-MS spectrum of compound <b>4i</b> (positive) .....                                                                                                                                                       | 18 |
| <sup>1</sup> H-NMR spectrum of compound <b>5a</b> .....                                                                                                                                                      | 18 |
| ESI-MS spectrum of compound <b>5a</b> (negative) .....                                                                                                                                                       | 18 |
| ESI-MS spectrum of compound <b>5a</b> (positive) .....                                                                                                                                                       | 19 |
| <sup>1</sup> H-NMR spectrum of compound <b>5c</b> .....                                                                                                                                                      | 20 |
| ESI-MS spectrum of compound <b>5c</b> (positive) .....                                                                                                                                                       | 20 |
| <sup>1</sup> H-NMR spectrum of compound <b>5e</b> .....                                                                                                                                                      | 21 |
| ESI-MS spectrum of compound <b>5e</b> (negative) .....                                                                                                                                                       | 21 |
| ESI-MS spectrum of compound <b>5e</b> (positive) .....                                                                                                                                                       | 22 |
| <sup>1</sup> H-NMR spectrum of compound <b>5i</b> .....                                                                                                                                                      | 22 |
| ESI-MS spectrum of compound <b>5i</b> (positive) .....                                                                                                                                                       | 22 |
| <sup>1</sup> H-NMR spectrum of compound <b>5j</b> .....                                                                                                                                                      | 23 |
| ESI-MS spectrum of compound <b>5j</b> (negative) .....                                                                                                                                                       | 23 |
| ESI-MS spectrum of compound <b>5j</b> (positive) .....                                                                                                                                                       | 24 |
| <sup>1</sup> H-NMR spectrum of compound <b>5k</b> .....                                                                                                                                                      | 24 |
| ESI-MS spectrum of compound <b>5k</b> (positive) .....                                                                                                                                                       | 25 |

**Scheme 1.** Synthesis of hydrazide hydrazones **4a-i** and **5a-k**

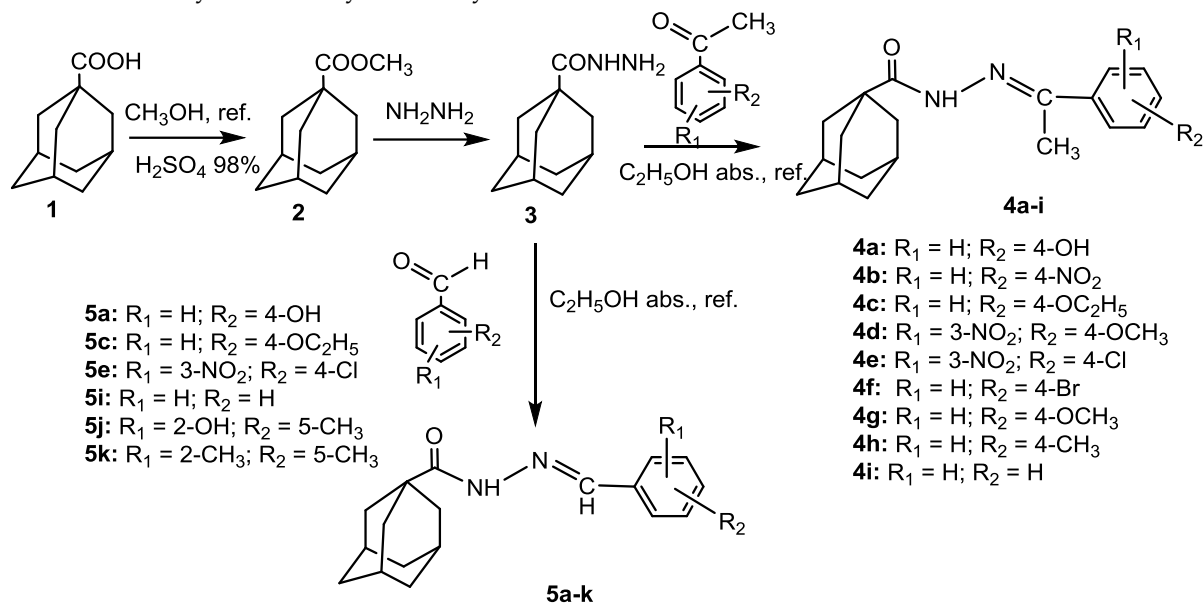

**Table 1.** Crystal solvent (Cryst. Solv.), melting point (m.p), yield (%), molecular formulae, molecular weight (Mol. Wt.) and Rf of hydrazide-hydrazones **4a-i** and **5a-k**.

| Comp. No. | R1                | R2                               | Cryst. Solv. | m.p (°C)     | Yield (%) | Molecular Formular (Mol. Wt.)                                            | TLC* (Rf) |
|-----------|-------------------|----------------------------------|--------------|--------------|-----------|--------------------------------------------------------------------------|-----------|
| 4a        | H                 | 4-OH                             | EtOH         | 252.5-254.1  | 30.6      | C <sub>19</sub> H <sub>24</sub> N <sub>2</sub> O <sub>2</sub> (312.41)   | 0.36      |
| 4b        | H                 | 4-NO <sub>2</sub>                | EtOH         | 226.0-227.6  | 60.5      | C <sub>19</sub> H <sub>23</sub> N <sub>3</sub> O <sub>3</sub> (341.41)   | 0.58      |
| 4c        | H                 | 4-OC <sub>2</sub> H <sub>5</sub> | EtOH         | 159.5-160.6  | 32.2      | C <sub>21</sub> H <sub>28</sub> N <sub>2</sub> O <sub>2</sub> (340.47)   | 0.57      |
| 4d        | 3-NO <sub>2</sub> | 4-OCH <sub>3</sub>               | EtOH         | 182.0-184.1  | 33.0      | C <sub>20</sub> H <sub>25</sub> N <sub>3</sub> O <sub>4</sub> (371.44)   | 0.44      |
| 4e        | 3-NO <sub>2</sub> | 4-Cl                             | EtOH         | 188.2-189.3  | 26.2      | C <sub>19</sub> H <sub>22</sub> ClN <sub>3</sub> O <sub>3</sub> (375.85) | 0.56      |
| 4f        | H                 | 4-Br                             | EtOH         | 190.7-191.0  | 29.0      | C <sub>19</sub> H <sub>23</sub> BrN <sub>2</sub> O (375.31)              | 0.62      |
| 4g        | H                 | 4-OCH <sub>3</sub>               | EtOH         | 171.6-173.0  | 30.0      | C <sub>20</sub> H <sub>26</sub> N <sub>2</sub> O <sub>2</sub> (326.44)   | 0.52      |
| 4h        | H                 | 4-CH <sub>3</sub>                | EtOH         | 179.5-180.4  | 37.3      | C <sub>20</sub> H <sub>26</sub> N <sub>2</sub> O (310.44)                | 0.66      |
| 4i        | H                 | H                                | EtOH         | 174.4-175.2  | 54.5      | C <sub>19</sub> H <sub>24</sub> N <sub>2</sub> O (296.41)                | 0.59      |
| 5a        | H                 | 4-OH                             | EtOH         | 289.6 -290.5 | 44.0      | C <sub>18</sub> H <sub>22</sub> N <sub>2</sub> O <sub>2</sub> (298.39)   | 0.33      |
| 5c        | H                 | 4-OC <sub>2</sub> H <sub>5</sub> | EtOH         | 235.2-236.4  | 15.1      | C <sub>20</sub> H <sub>26</sub> N <sub>2</sub> O <sub>2</sub> (326.44)   | 0.59      |
| 5e        | 3-NO <sub>2</sub> | 4-Cl                             | EtOH         | 247.8-248.5  | 50.6      | C <sub>18</sub> H <sub>20</sub> ClN <sub>3</sub> O <sub>3</sub> (361.83) | 0.55      |
| 5i        | H                 | H                                | EtOH         | 186.9-187.2  | 60.5      | C <sub>18</sub> H <sub>22</sub> N <sub>2</sub> O (282.39)                | 0.54      |
| 5j        | 2-OH              | 5-CH <sub>3</sub>                | EtOH         | 247.6-248.8  | 60.4      | C <sub>19</sub> H <sub>24</sub> N <sub>2</sub> O <sub>2</sub> (312.41)   | 0.57      |
| 5k        | 2-CH <sub>3</sub> | 5-CH <sub>3</sub>                | EtOH         | 283.5-284.0  | 35.5      | C <sub>20</sub> H <sub>26</sub> N <sub>2</sub> O (310.44)                | 0.45      |

**Table 2.** MIC of synthesized hydrazide-hydrazole **4a-i** and **5a-k**

| Comp. No. | MIC of synthesized compounds ( $\mu\text{M}$ ) |                      |                      |                     |                      |                      |                     |
|-----------|------------------------------------------------|----------------------|----------------------|---------------------|----------------------|----------------------|---------------------|
|           | Gram (+)                                       |                      |                      | Gram (-)            |                      |                      | Fungus              |
|           | EF                                             | SA                   | BC                   | EC                  | PA                   | SE                   | CA                  |
| <b>4a</b> | 12.5                                           | 12.5                 | 12.5                 | -                   | -                    | -                    | 12.5                |
| <b>4b</b> | 25                                             | 25                   | 25                   | -                   | -                    | -                    | 25                  |
| <b>4c</b> | 25                                             | 25                   | 25                   | -                   | -                    | -                    | 25                  |
| <b>4d</b> | 12.5                                           | 50                   | 100                  | -                   | -                    | -                    | 6.25                |
| <b>4e</b> | 25                                             | 50                   | 50                   | -                   | -                    | -                    | 25                  |
| <b>4f</b> | 50                                             | 50                   | 50                   | -                   | -                    | -                    | 12.5                |
| <b>4g</b> | 25                                             | 25                   | 100                  | -                   | -                    | -                    | 25                  |
| <b>4h</b> | 25                                             | 25                   | 50                   | -                   | -                    | -                    | 12.5                |
| <b>4i</b> | 25                                             | 50                   | 50                   | -                   | -                    | -                    | 25                  |
| <b>5a</b> | 12.5                                           | 25                   | 25                   | -                   | -                    | -                    | 12.5                |
| <b>5c</b> | 12.5                                           | 50                   | 100                  | -                   | -                    | -                    | 12.5                |
| <b>5e</b> | 25                                             | 25                   | 25                   | -                   | -                    | -                    | 25                  |
| <b>5i</b> | 50                                             | 50                   | 50                   | -                   | -                    | -                    | 50                  |
| <b>5j</b> | 50                                             | 50                   | 50                   | -                   | -                    | -                    | 25                  |
| <b>5k</b> | 25                                             | 25                   | 25                   | -                   | -                    | -                    | 25                  |
| STM       | 256 $\mu\text{g/mL}$                           | 256 $\mu\text{g/mL}$ | 128 $\mu\text{g/mL}$ | 32 $\mu\text{g/mL}$ | 256 $\mu\text{g/mL}$ | 128 $\mu\text{g/mL}$ | NT                  |
| CHM       | NT                                             | NT                   | NT                   | NT                  | NT                   | NT                   | 32 $\mu\text{g/mL}$ |

EF: *Enterococcus faecalis* (ATCC13124); SA: *Staphylococcus aureus* (ATCC25923); BC: *Bacillus cereus* (ATCC 13245); EC: *Escherichia coli* (ATCC25922); PA: *Pseudomonas aeruginosa* (ATCC27853); SE: *Salmonella enterica* (ATCC12228); CA: *Candida albicans* (ATCC10231); STM: streptomycine; CHM: Cycloheximide; NT: not tested; - : inactive

**Table 3.** IC<sub>50</sub> of synthesized hydrazide-hydrazole **4a-i** and **5a-k**

| Comp. No. | IC50 of synthesized compounds (µM) |       |       |          |    |    | Fungus |
|-----------|------------------------------------|-------|-------|----------|----|----|--------|
|           | Gram (+)                           |       |       | Gram (-) |    |    |        |
|           | EF                                 | SA    | BC    | EC       | PA | SE | CA     |
| <b>4a</b> | 6.35                               | 6.77  | 6.12  | -        | -  | -  | 6.37   |
| <b>4b</b> | 11.56                              | 11.45 | 12.56 | -        | -  | -  | 12.78  |
| <b>4c</b> | 13.24                              | 12.67 | 12.77 | -        | -  | -  | 13.11  |
| <b>4d</b> | 6.88                               | 25.45 | 52.11 | -        | -  | -  | 3.56   |
| <b>4e</b> | 13.55                              | 25.11 | 25.99 | -        | -  | -  | 13.57  |
| <b>4f</b> | 24.79                              | 13.44 | 25.33 | -        | -  | -  | 6.77   |
| <b>4g</b> | 12.56                              | 12.55 | 56.7  | -        | -  | -  | 11.55  |
| <b>4h</b> | 13.22                              | 13.45 | 23.88 | -        | -  | -  | 6.45   |
| <b>4i</b> | 12.56                              | 25.66 | 25.65 | -        | -  | -  | 12.33  |
| <b>5a</b> | 6.73                               | 12.33 | 12.37 | -        | -  | -  | 6.25   |
| <b>5c</b> | 6.77                               | 26.55 | 26.78 | -        | -  | -  | 6.66   |
| <b>5e</b> | 13.25                              | 12.67 | 12.33 | -        | -  | -  | 13.22  |
| <b>5i</b> | 25.66                              | 26.55 | 26.56 | -        | -  | -  | 25.33  |
| <b>5j</b> | 24.58                              | 24.56 | 24.33 | -        | -  | -  | 11.45  |
| <b>5k</b> | 12.35                              | 12.45 | 12.33 | -        | -  | -  | 13.46  |

EF: *Enterococcus faecalis* (ATCC13124); SA: *Staphylococcus aureus* (ATCC25923); BC: *Bacillus cereus* (ATCC 13245); EC: *Escherichia coli* (ATCC25922); PA: *Pseudomonas aeruginosa* (ATCC27853); SE: *Salmonella enterica* (ATCC12228); CA: *Candida albicans* (ATCC10231); - : inactive.

**Table 4.** The effect of newly synthesized hydrazide-hydrazole **4a-i** and **5a-k** on the viability of HeP3B, HeLa, A549 and MCF-7 cell after 48 h of incubation

| Comp. No.   | Conc.    | Hep3B        | HeLa         | A549         | MCF-7        |
|-------------|----------|--------------|--------------|--------------|--------------|
| <b>4a</b>   | 30µM     | 63.89 ± 0.69 | 73.09 ± 2.31 | 67.78 ± 0.26 | 63.28 ± 1.41 |
|             | 100 µM   | 56.53 ± 1.32 | 66.87 ± 1.10 | 51.63 ± 0.81 | 58.60 ± 0.32 |
| <b>4b</b>   | 30µM     | 66.83 ± 1.15 | 82.84 ± 1.37 | 66.89 ± 0.94 | 64.32 ± 2.92 |
|             | 100 µM   | 56.49 ± 2.17 | 77.20 ± 0.90 | 62.26 ± 0.15 | 52.64 ± 2.02 |
| <b>4c</b>   | 30µM     | 80.62 ± 1.25 | 93.64 ± 0.88 | 77.76 ± 1.51 | 79.36 ± 1.40 |
|             | 100 µM   | 72.74 ± 2.00 | 90.51 ± 1.28 | 70.20 ± 0.13 | 67.78 ± 0.95 |
| <b>4d</b>   | 30µM     | 96.80 ± 0.26 | > 100        | 65.33 ± 1.28 | 90.20 ± 0.25 |
|             | 100 µM   | 84.59 ± 2.39 | 86.34 ± 1.35 | 62.01 ± 2.37 | 78.82 ± 2.22 |
| <b>4e</b>   | 30µM     | 94.59 ± 2.20 | 80.07 ± 1.87 | 64.43 ± 0.49 | 60.94 ± 1.39 |
|             | 100 µM   | 55.91 ± 1.70 | 44.37 ± 1.39 | 38.51 ± 1.59 | 38.69 ± 1.20 |
| <b>4f</b>   | 30µM     | >100         | 88.26 ± 1.74 | 76.22 ± 0.98 | 94.68 ± 1.33 |
|             | 100 µM   | 97.95 ± 2.43 | 83.18 ± 0.20 | 73.68 ± 1.03 | 91.27 ± 2.26 |
| <b>4g</b>   | 30µM     | 91.63 ± 2.63 | 96.61 ± 1.98 | 87.40 ± 0.95 | 83.11 ± 2.86 |
|             | 100 µM   | 77.00 ± 1.84 | 79.46 ± 1.28 | 70.61 ± 1.66 | 71.75 ± 1.71 |
| <b>4h</b>   | 30µM     | 98.29 ± 2.46 | > 100        | 78.42 ± 0.83 | 91.59 ± 2.29 |
|             | 100 µM   | 75.83 ± 2.76 | 99.77 ± 1.89 | 68.99 ± 2.36 | 70.66 ± 2.57 |
| <b>4i</b>   | 30µM     | 81.96 ± 1.67 | 88.70 ± 1.79 | 68.43 ± 1.72 | 59.77 ± 2.41 |
|             | 100 µM   | 80.7 ± 2.17  | 87.75 ± 0.29 | 67.73 ± 1.89 | 57.24 ± 0.75 |
| <b>5a</b>   | 30µM     | 87.03 ± 1.28 | 87.53 ± 0.21 | 69.08 ± 2.56 | 86.14 ± 0.49 |
|             | 100 µM   | 68.89 ± 2.18 | 68.26 ± 2.02 | 50.78 ± 1.86 | 64.33 ± 1.76 |
| <b>5c</b>   | 30µM     | 88.96 ± 0.91 | 89.07 ± 1.21 | 90.47 ± 2.23 | 70.30 ± 1.23 |
|             | 100 µM   | 78.97 ± 1.82 | 85.41 ± 1.34 | 81.32 ± 1.20 | 65.62 ± 0.64 |
| <b>5e</b>   | 30µM     | 57.77 ± 1.59 | 76.75 ± 1.07 | 36.42 ± 0.94 | 52.56 ± 0.75 |
|             | 100 µM   | 37.78 ± 2.44 | 40.42 ± 0.38 | 19.62 ± 1.74 | 34.13 ± 2.22 |
| <b>5i</b>   | 30µM     | 83.16 ± 1.19 | 89.12 ± 2.43 | 79.49 ± 0.94 | 71.53 ± 1.64 |
|             | 100 µM   | 74.90 ± 1.34 | 84.28 ± 2.12 | 55.22 ± 1.63 | 65.31 ± 1.66 |
| <b>5j</b>   | 30µM     | 92.80 ± 2.24 | 68.96 ± 2.38 | 78.71 ± 1.75 | 86.48 ± 2.08 |
|             | 100 µM   | 85.71 ± 2.28 | 57.90 ± 1.35 | 59.18 ± 2.01 | 79.86 ± 2.13 |
| <b>5k</b>   | 30µM     | 98.51 ± 0.38 | 82.96 ± 0.59 | 62.55 ± 0.59 | 91.80 ± 0.35 |
|             | 100 µM   | 83.34 ± 1.65 | 74.27 ± 1.67 | 52.39 ± 1.54 | 77.66 ± 1.54 |
| <b>CPT*</b> | 0.1µg/mL | 69.56 ± 1.27 | 57.06 ± 1.35 | 67.68 ± 1.88 | 56.68 ± 0.68 |
|             | 5 µg/mL  | 37.65 ± 1.21 | 18.61 ± 0.56 | 26.74 ± 2.16 | 28.89 ± 1.07 |

\*Camptothecine.

Data is presented as percentage of the cell viability ± SD.

<sup>1</sup>H-NMR spectrum of compound 4a

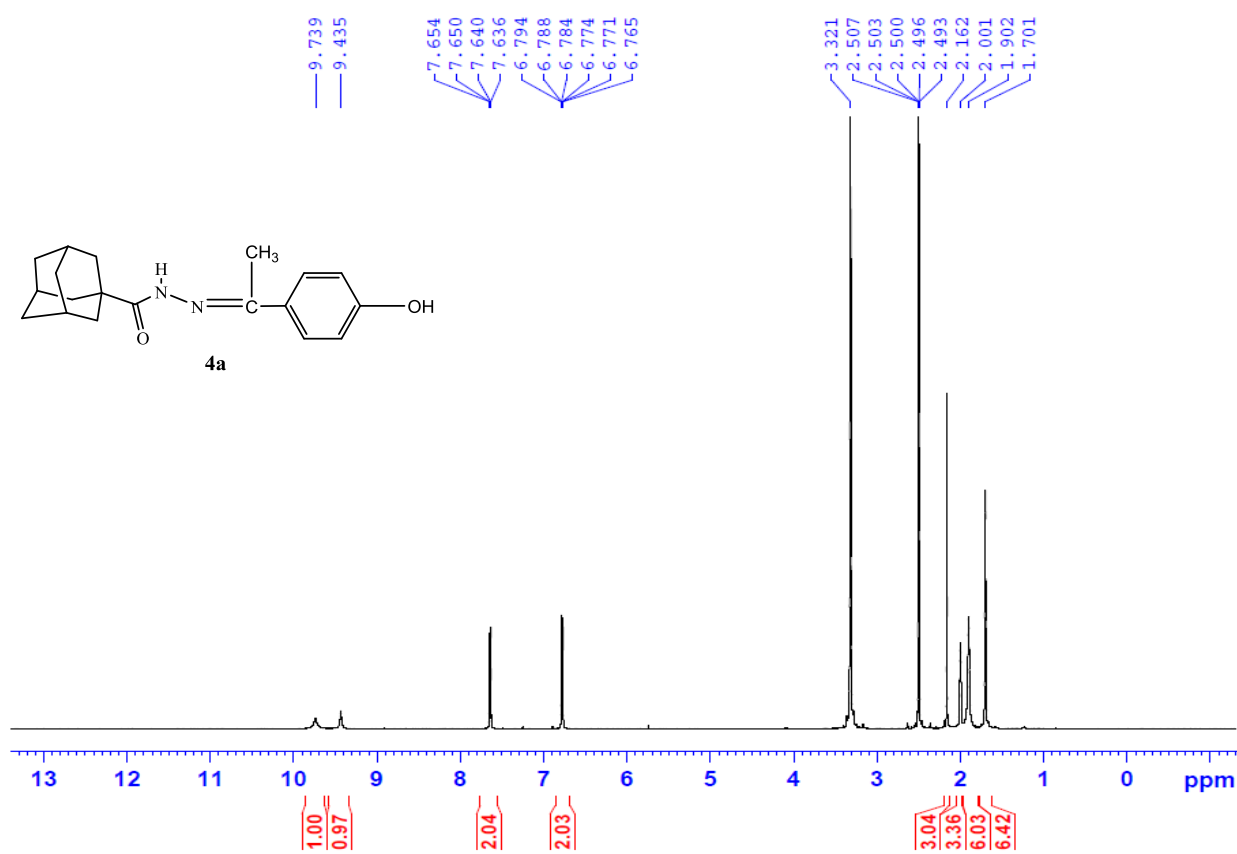

<sup>13</sup>C-NMR spectrum of compound 4a

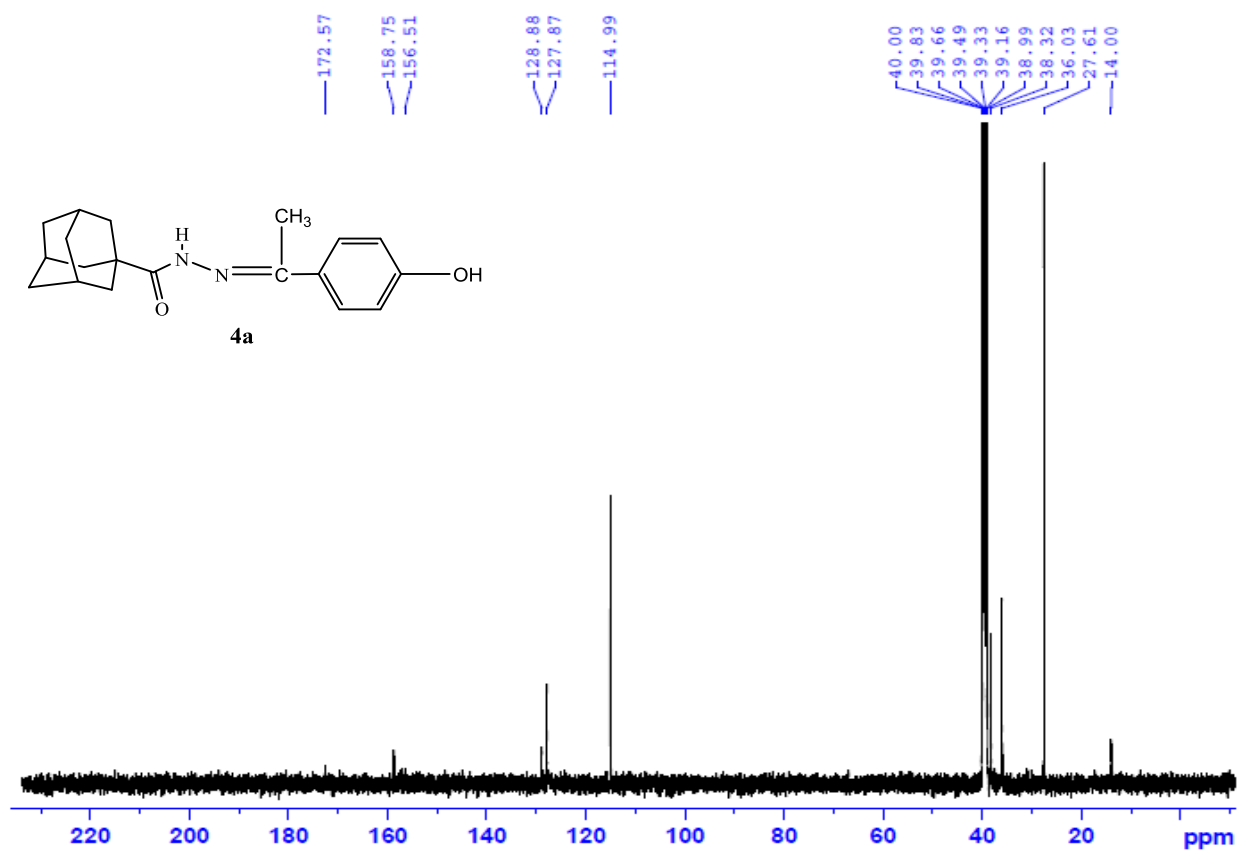



HMBC spectrum of compound 4a

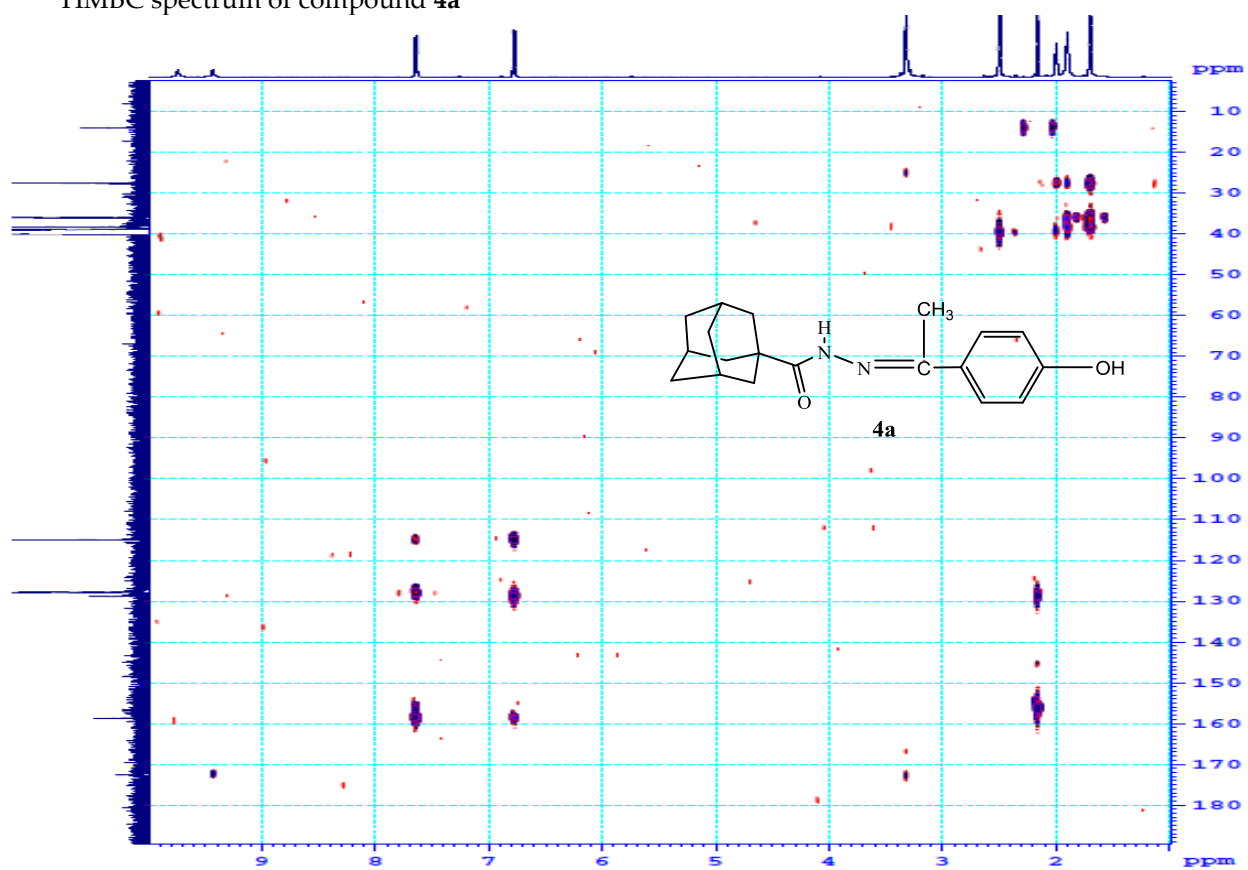

HSQC spectrum of compound 4a

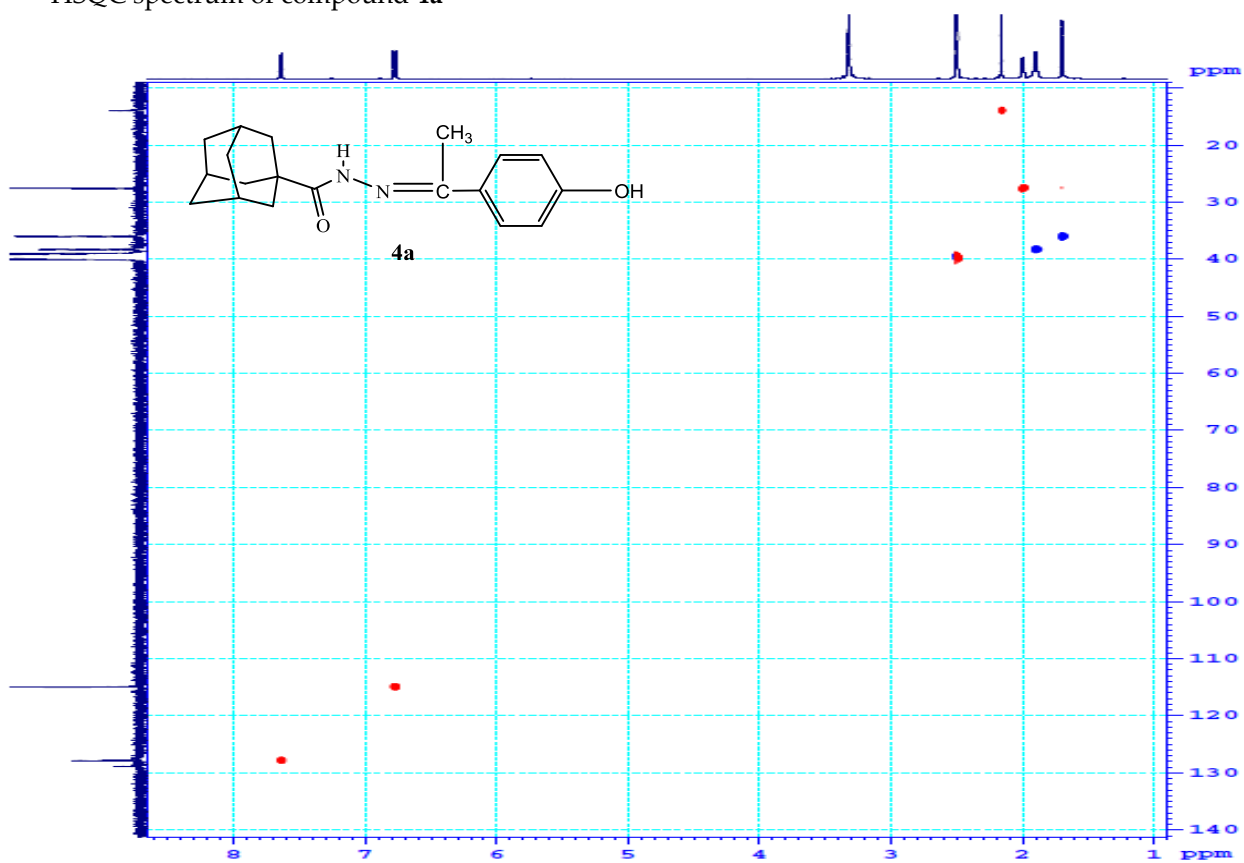

ESI-MS spectrum of compound **4a** (negative)

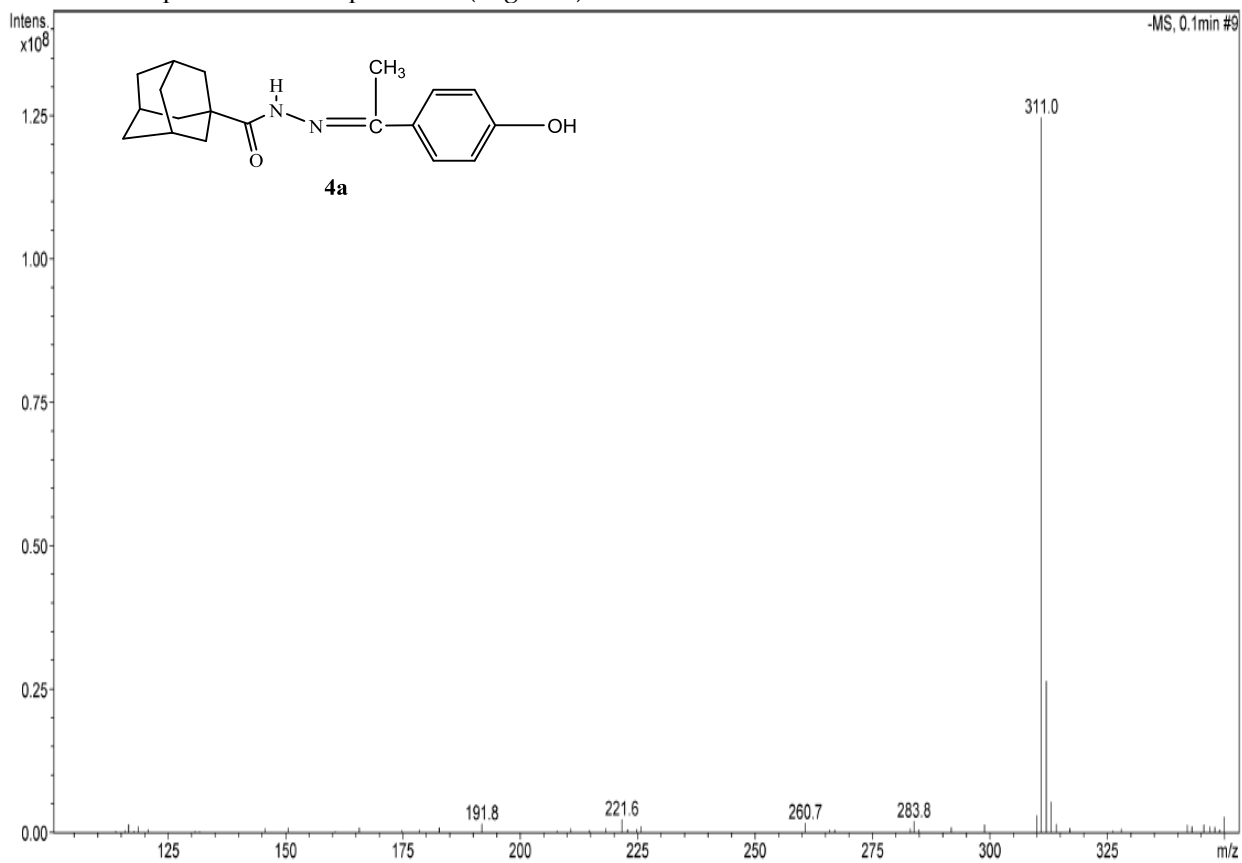

ESI-MS spectrum of compound **4a** (positive)

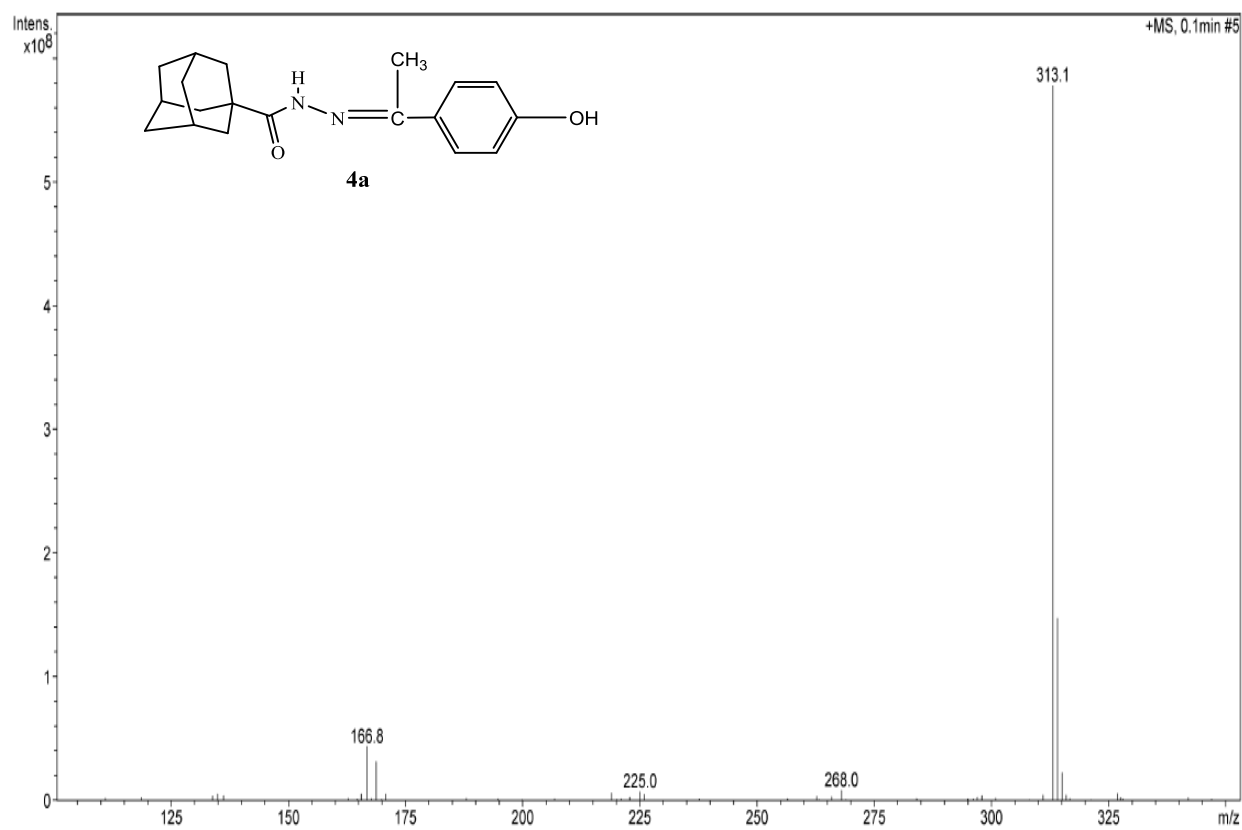

<sup>1</sup>H-NMR spectrum of compound **4b**

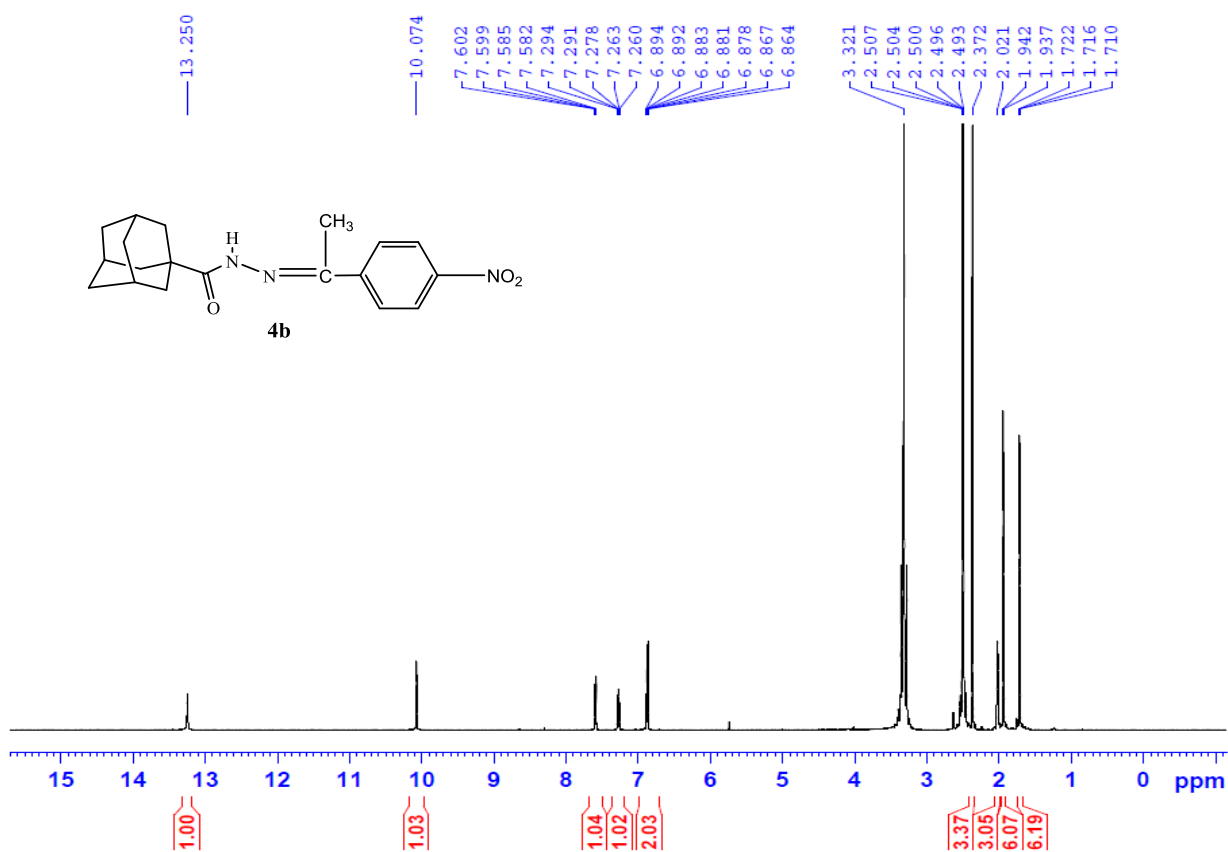

ESI-MS spectrum of compound **4b** (negative)

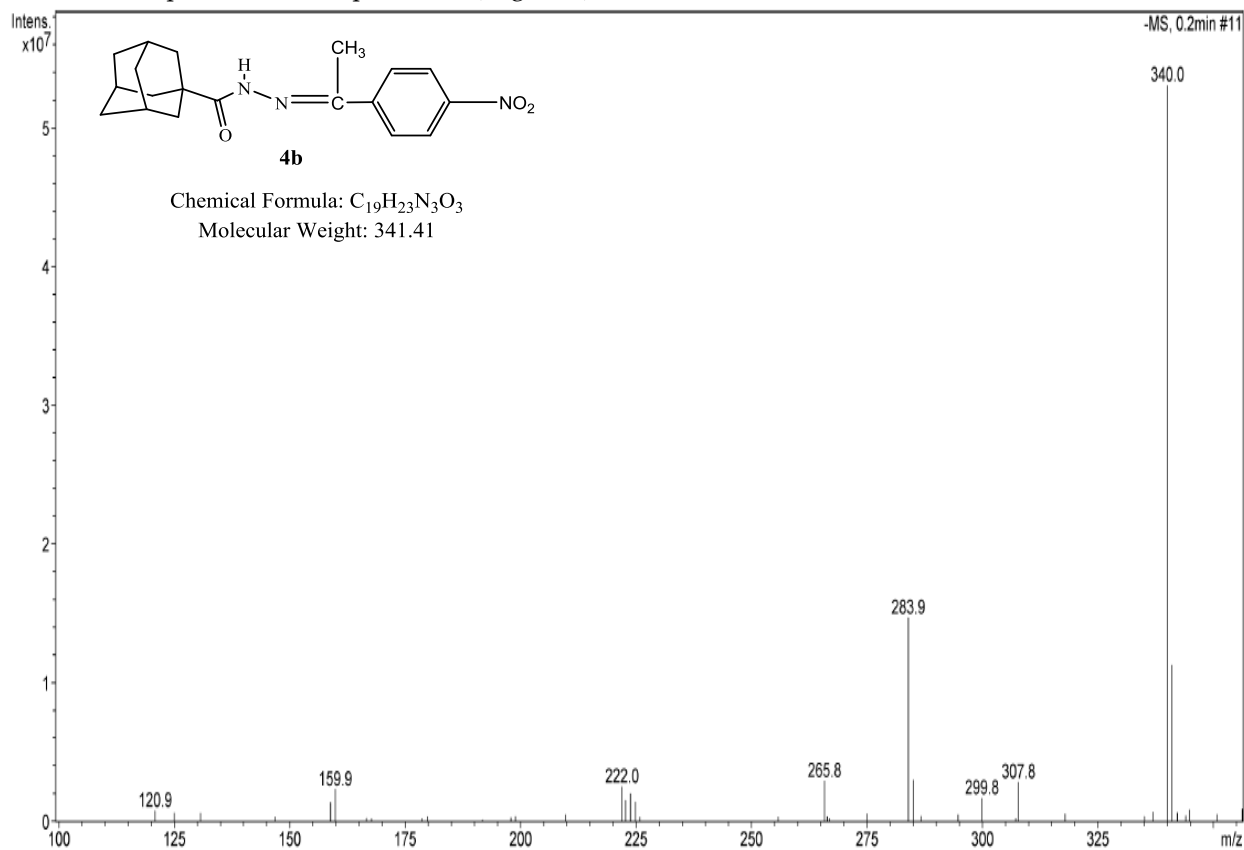

ESI-MS spectrum of compound **4b** (positive)

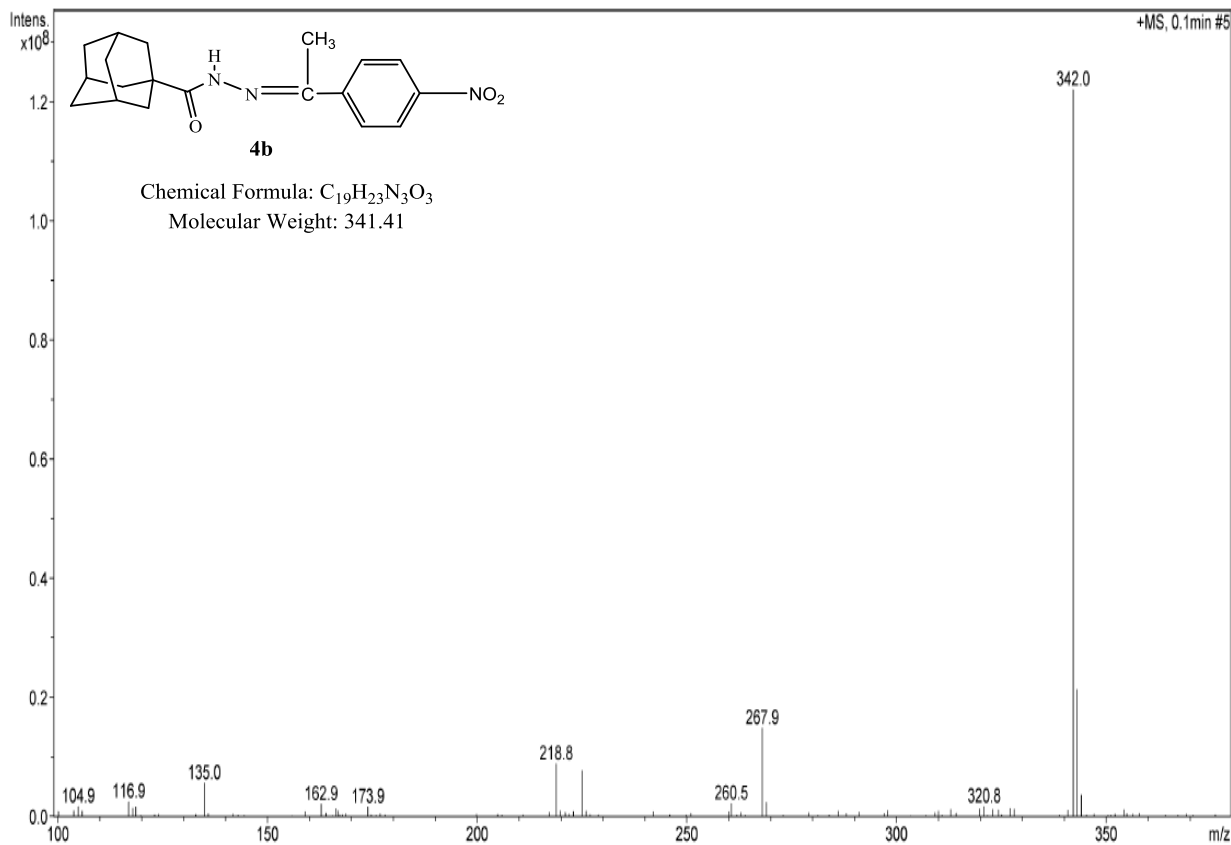

$^1H$ -NMR spectrum of compound **4c**

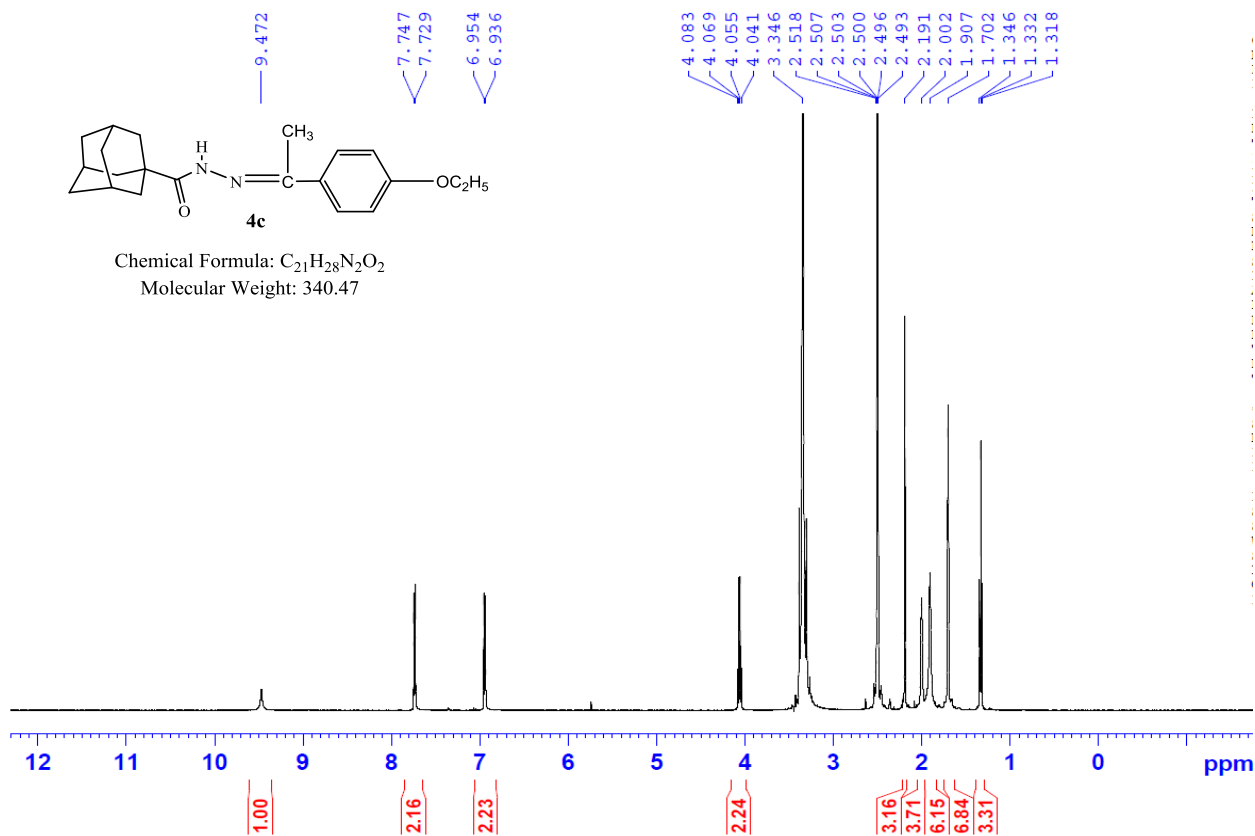

ESI-MS spectrum of compound **4c** (negative)

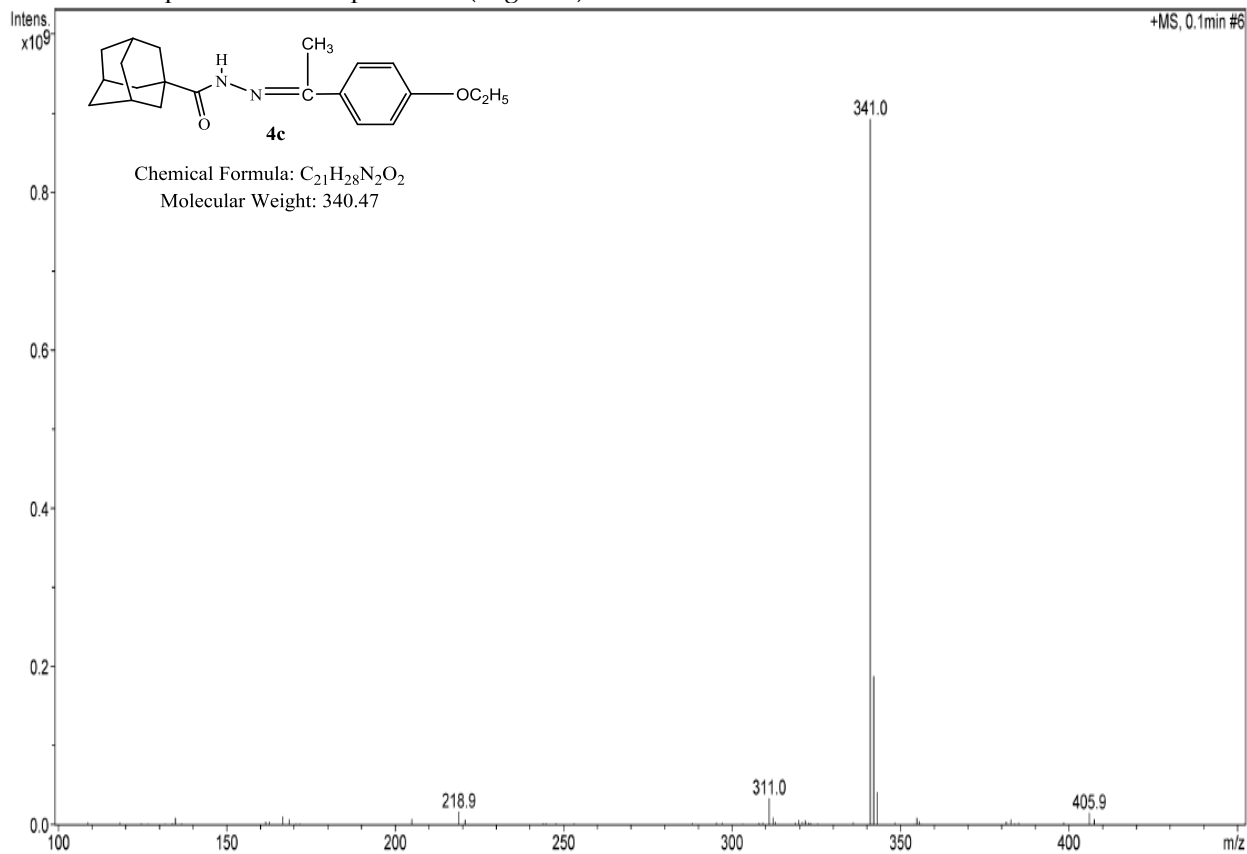

$^1H$ -NMR spectrum of compound **4d**

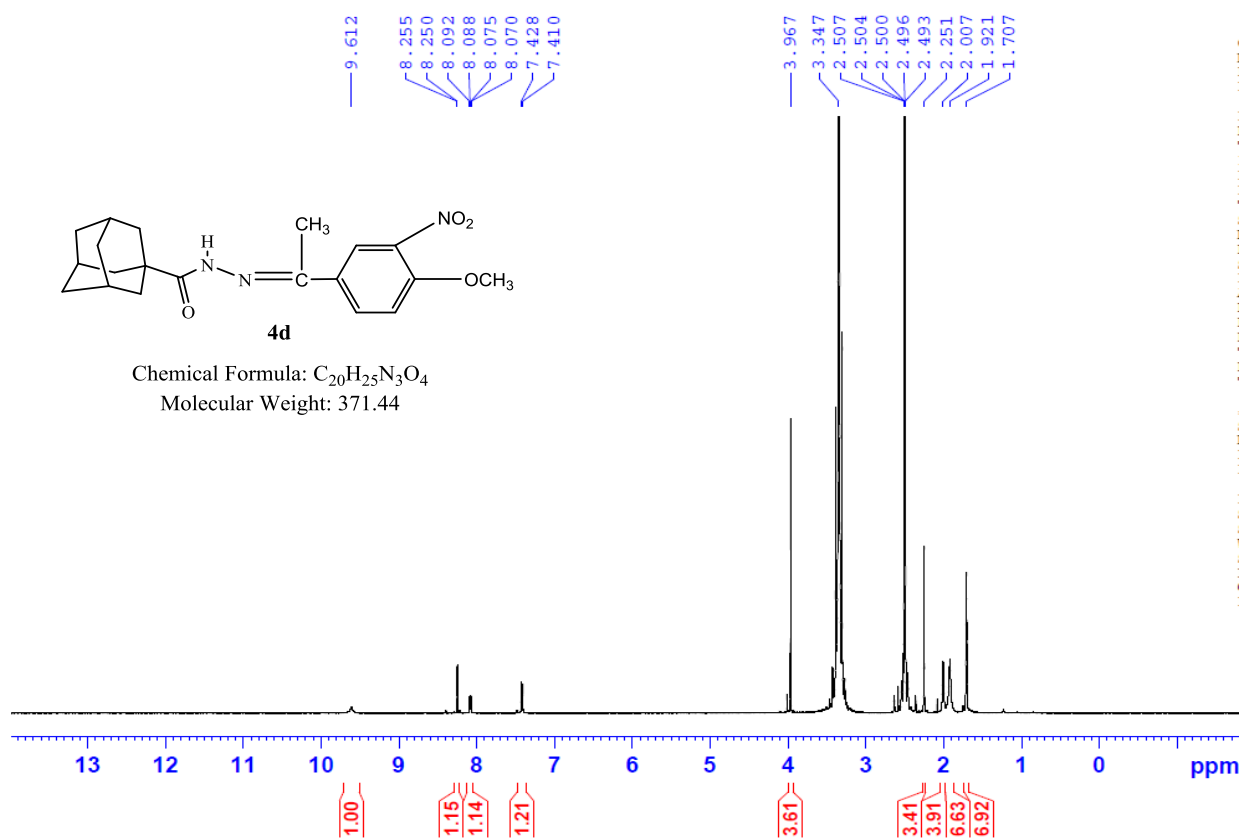

ESI-MS spectrum of compound **4d** (negative)

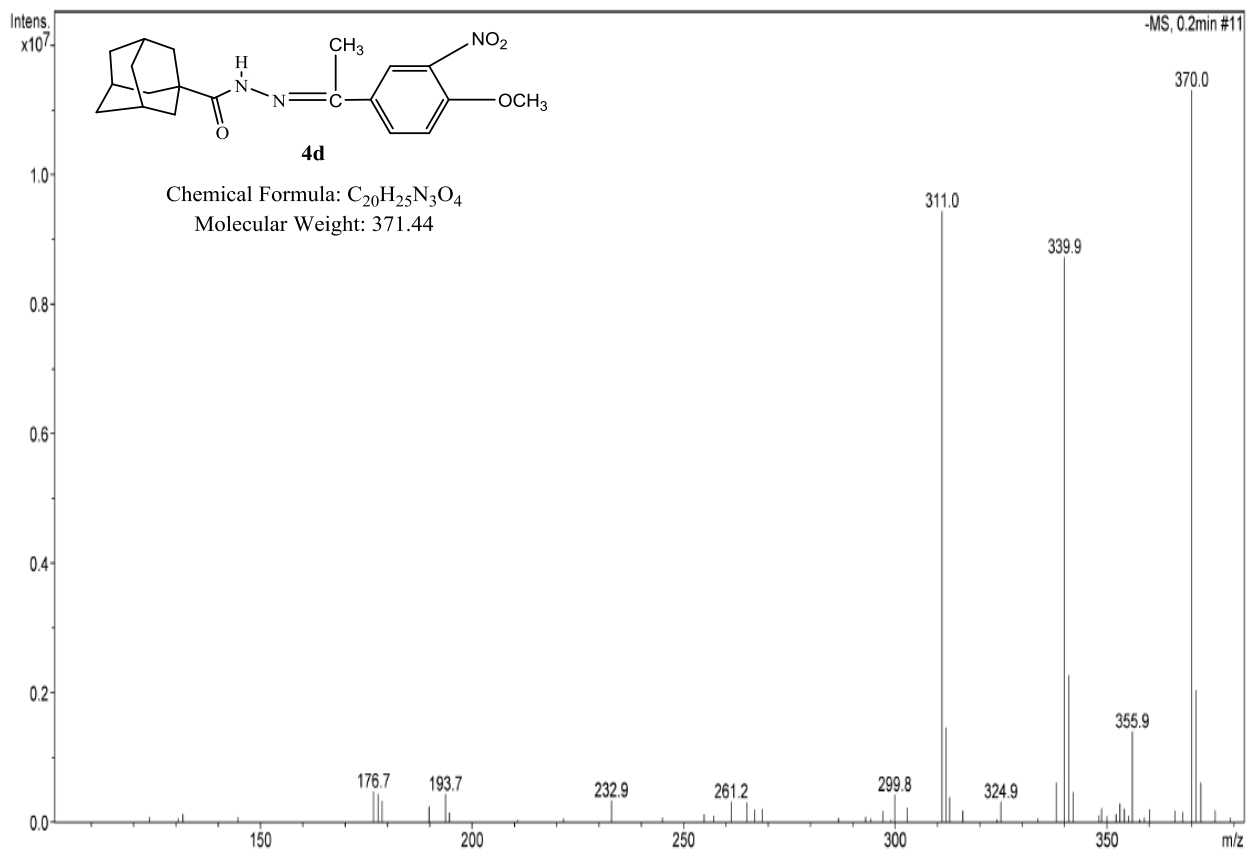

ESI-MS spectrum of compound **4d** (positive)

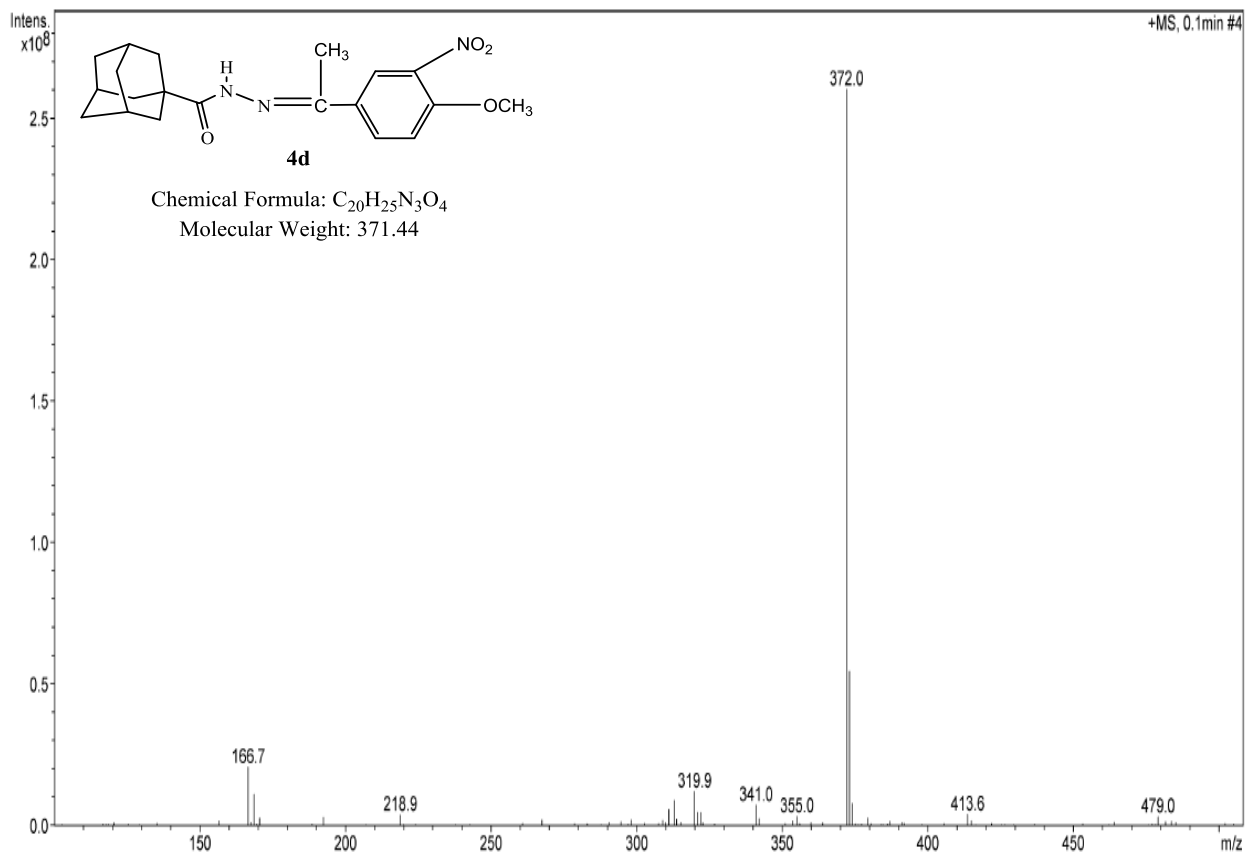

<sup>1</sup>H-NMR spectrum of compound **4e**

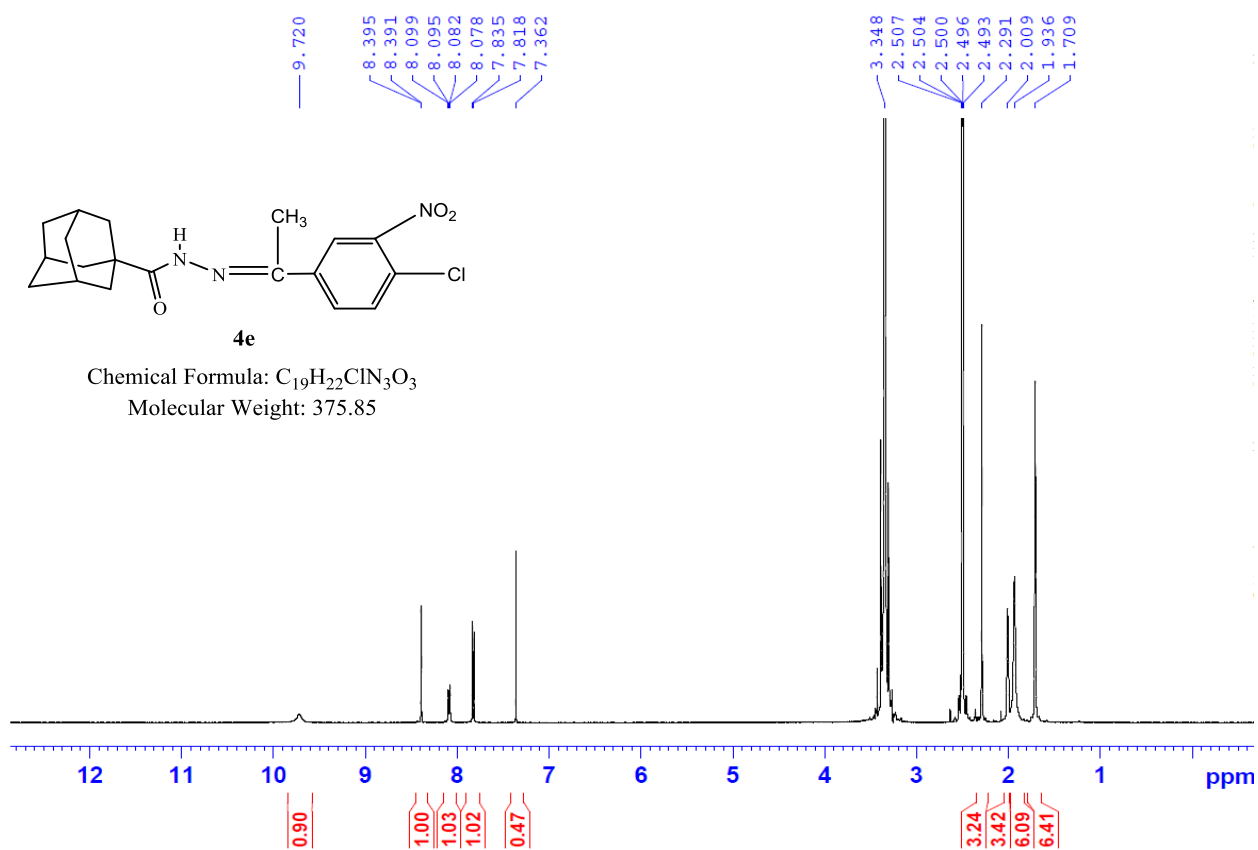

ESI-MS spectrum of compound **4e** (negative)

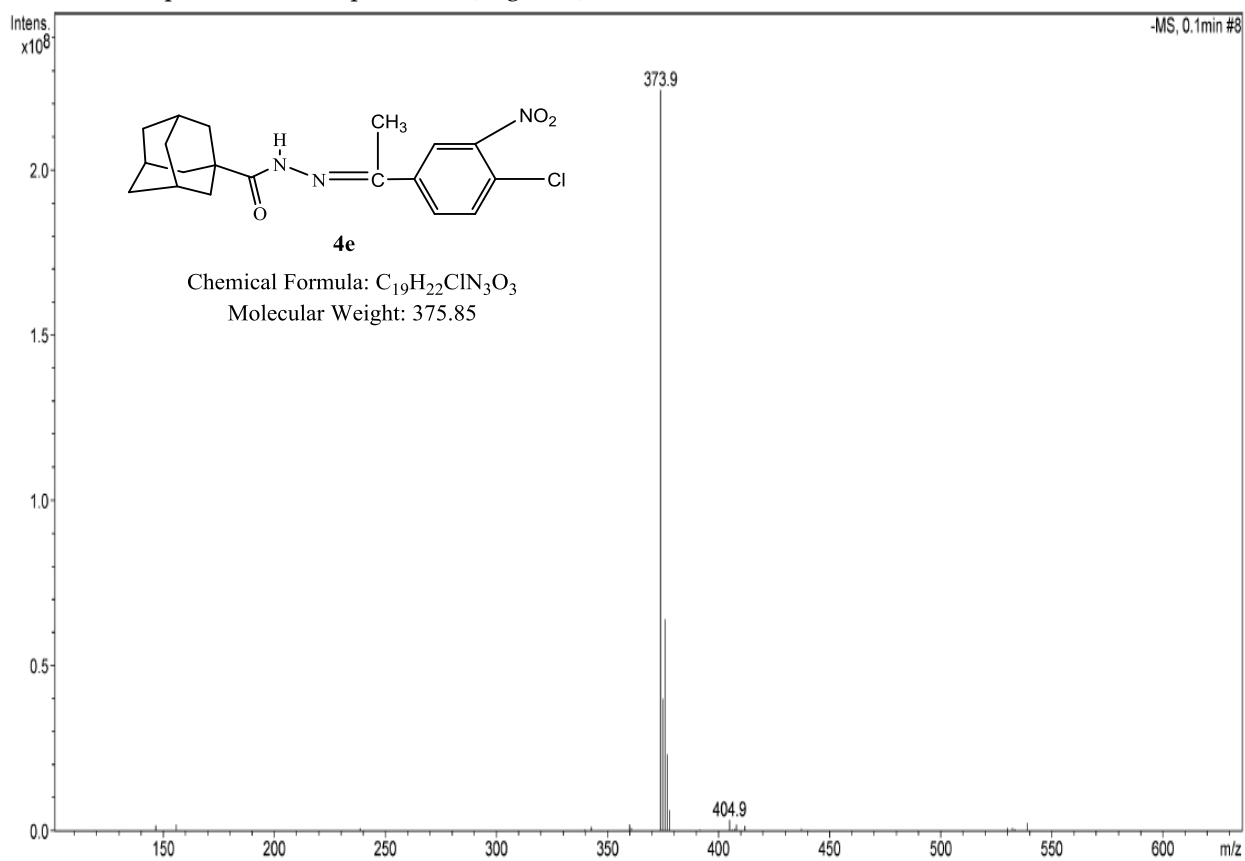

ESI-MS spectrum of compound **4e** (positive)

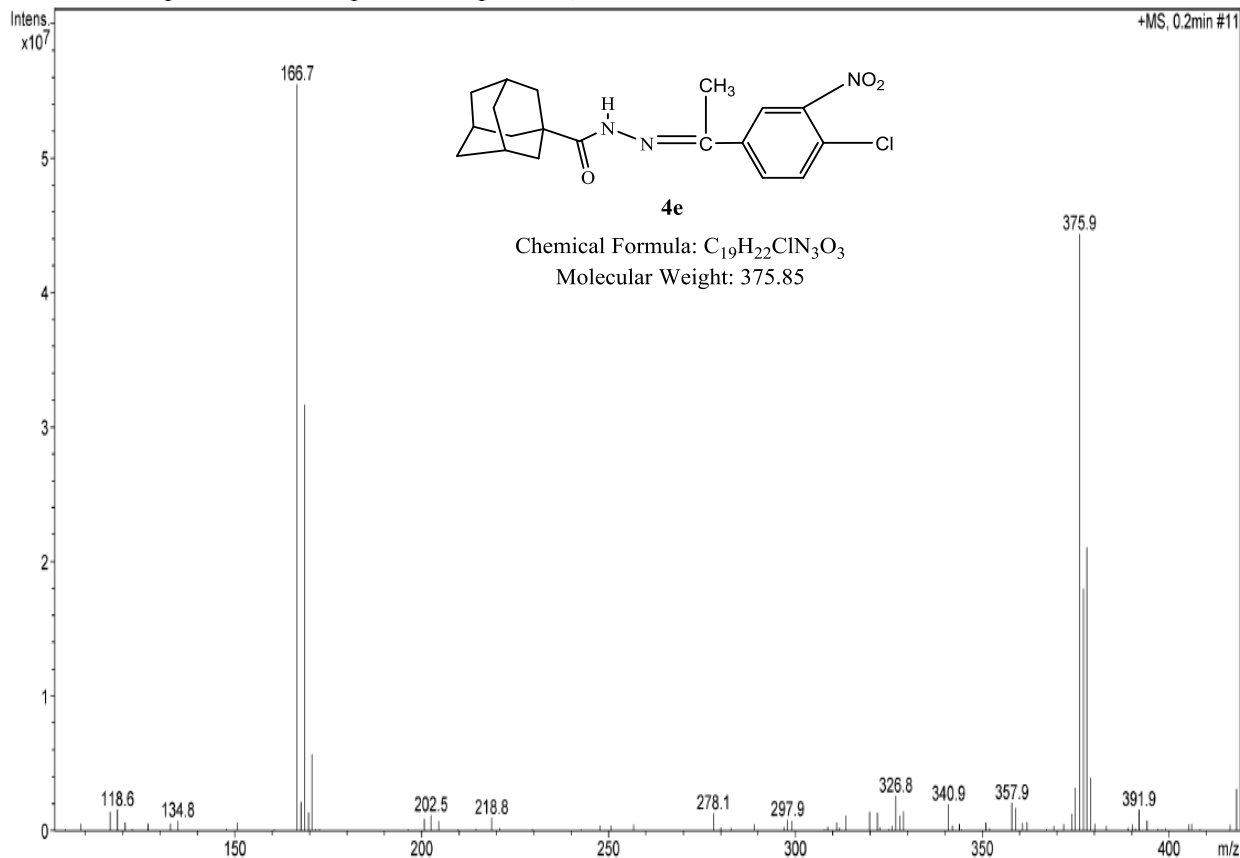

$^1H$ -NMR spectrum of compound **4f**

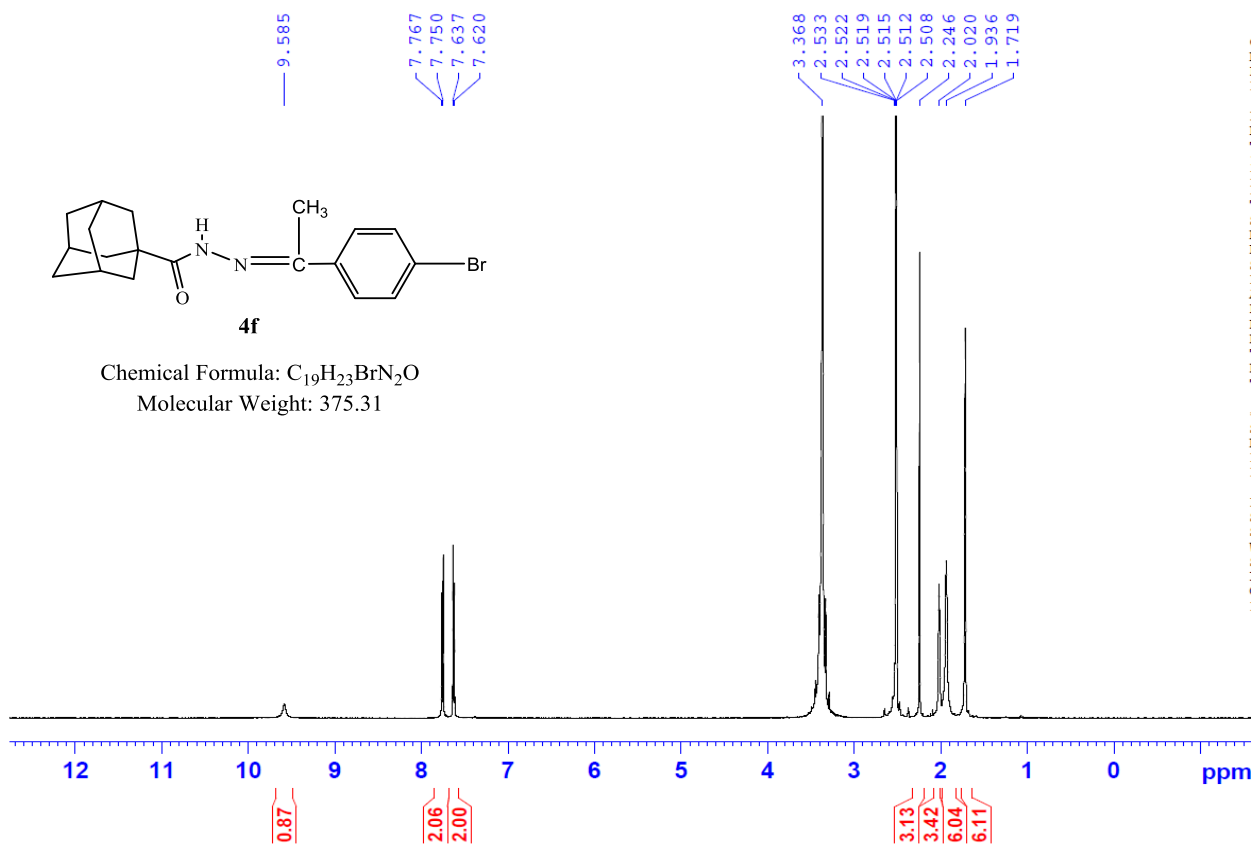

ESI-MS spectrum of compound **4f** (positive)



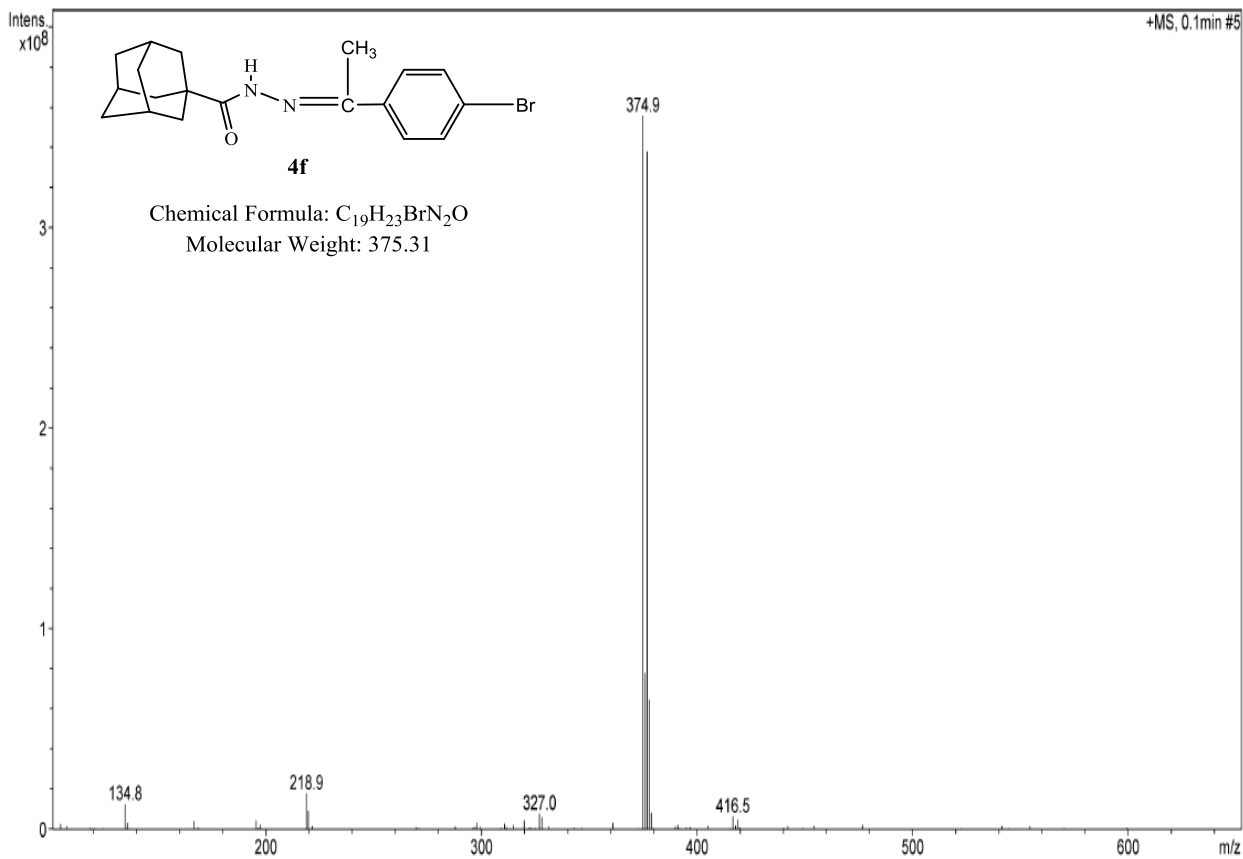

<sup>1</sup>H-NMR spectrum of compound **4g**

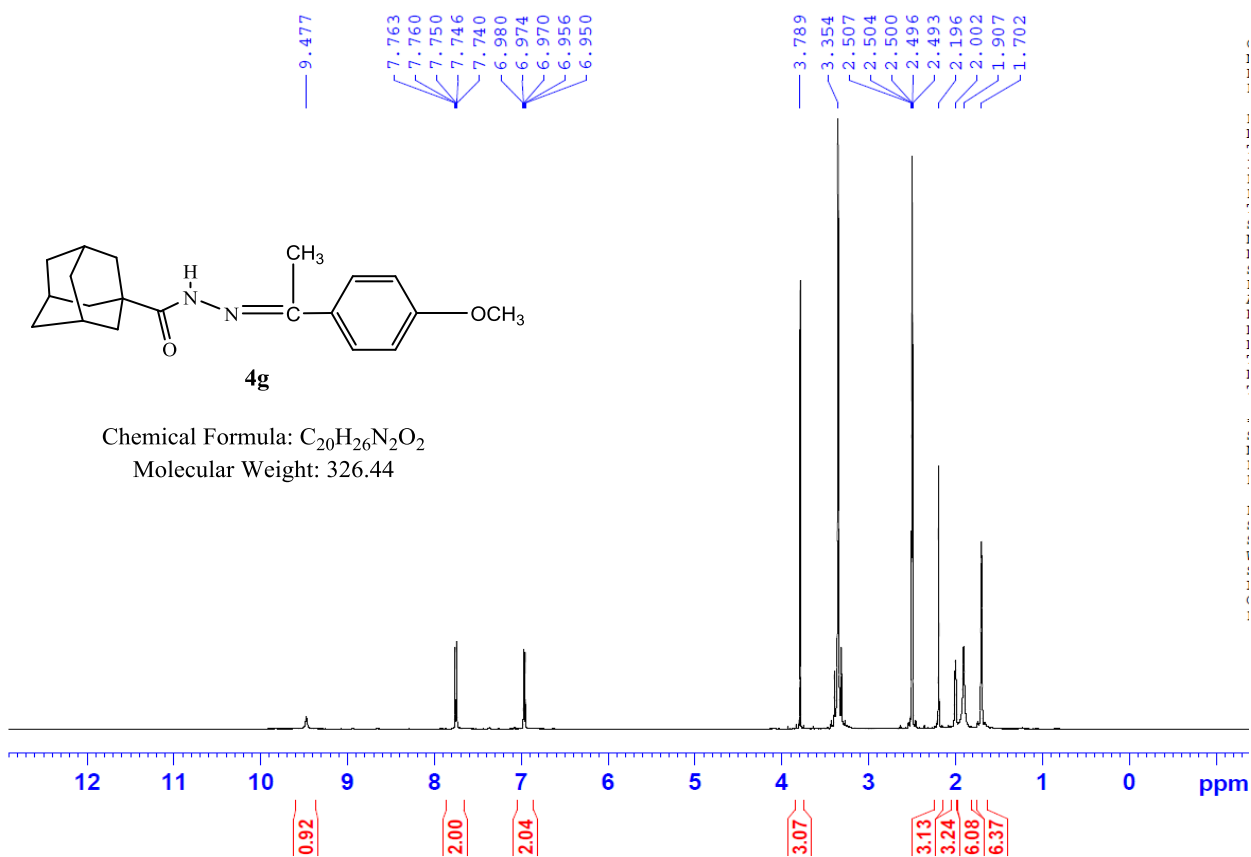

ESI-MS spectrum of compound **4g** (positive)

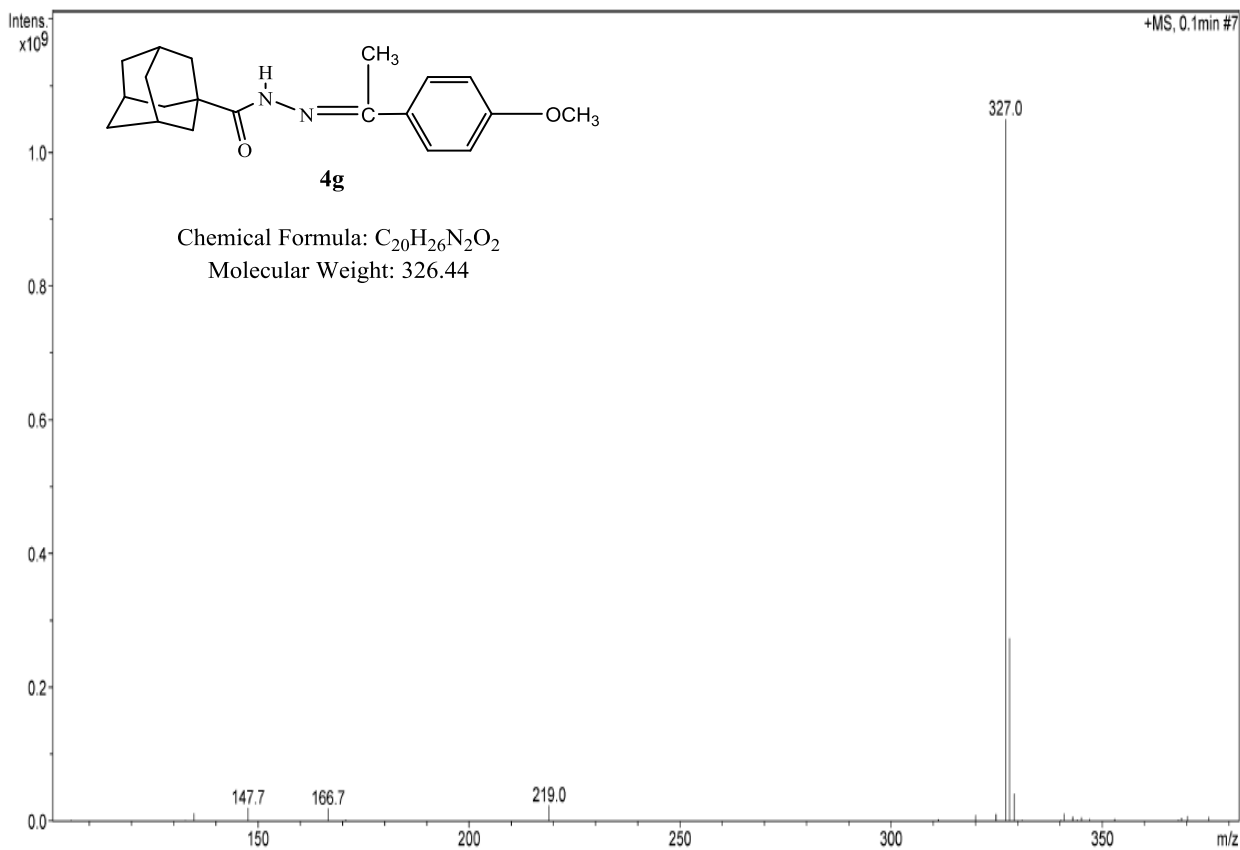

<sup>1</sup>H-NMR spectrum of compound **4h**

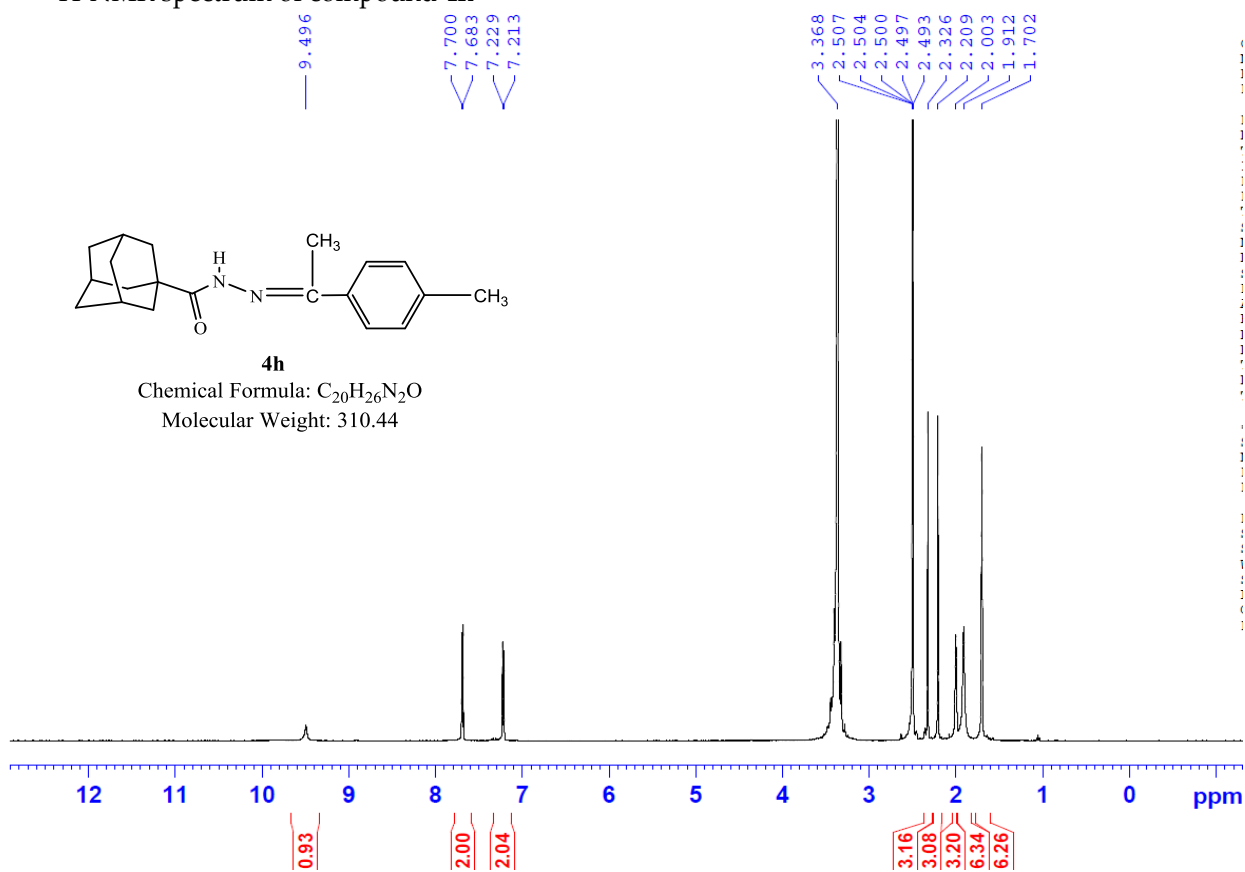

ESI-MS spectrum of compound **4h** (positive)

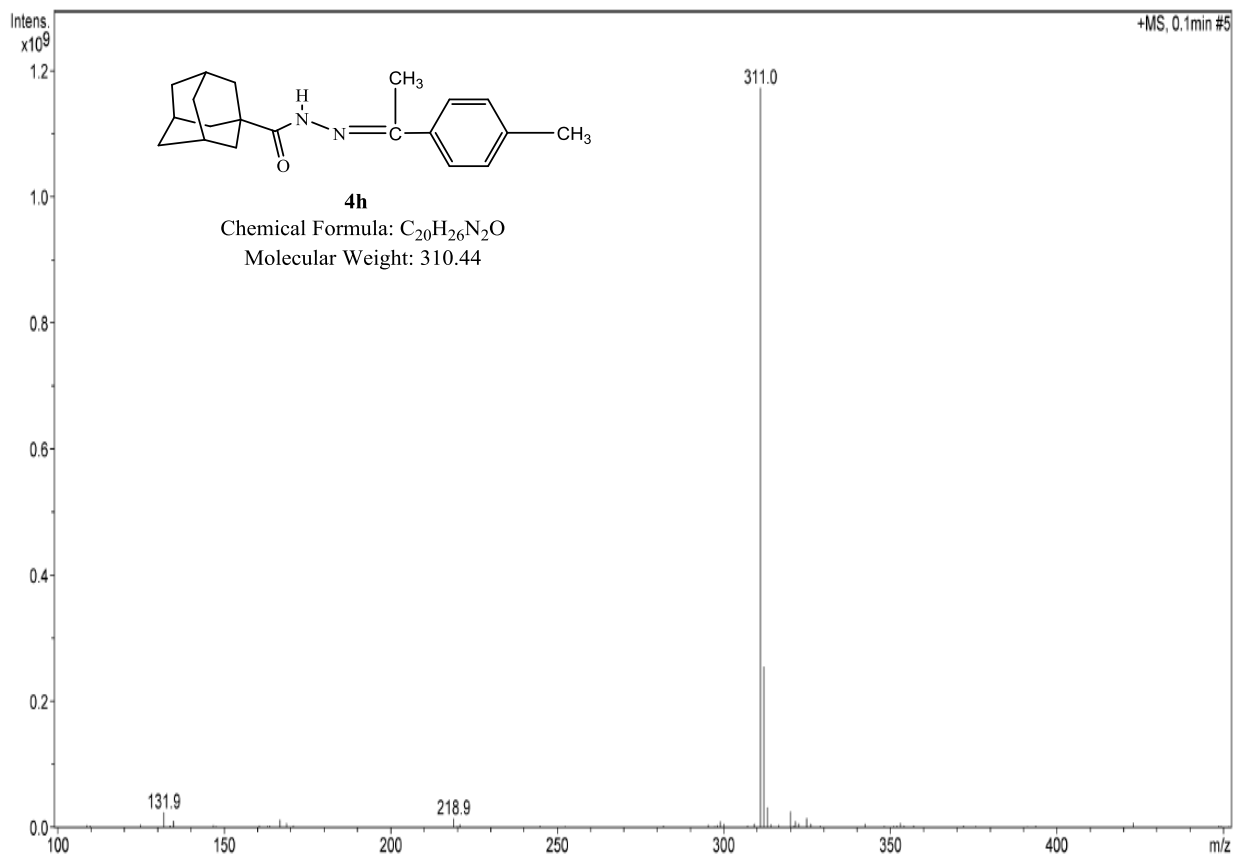

$^1H$ -NMR spectrum of compound **4i**

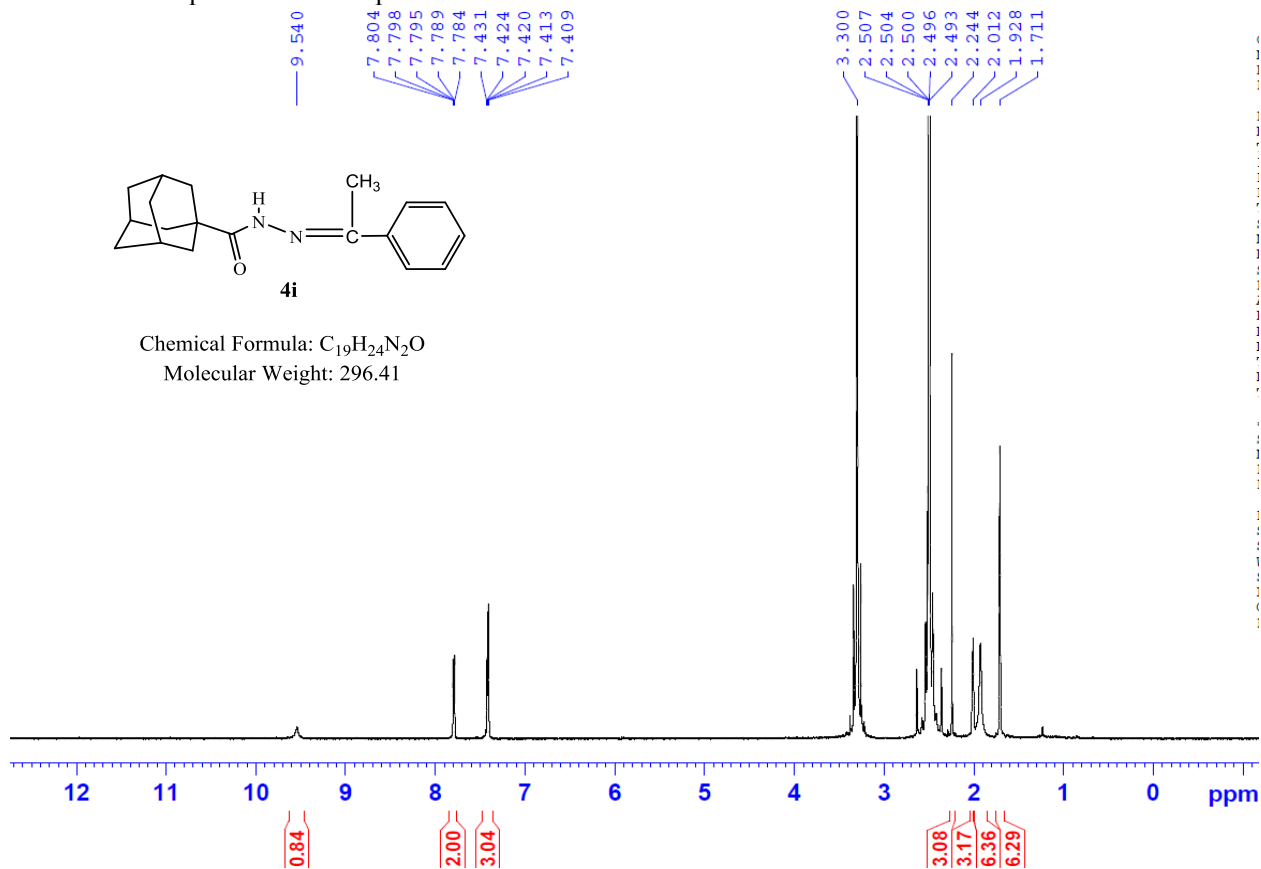

ESI-MS spectrum of compound **4i** (positive)

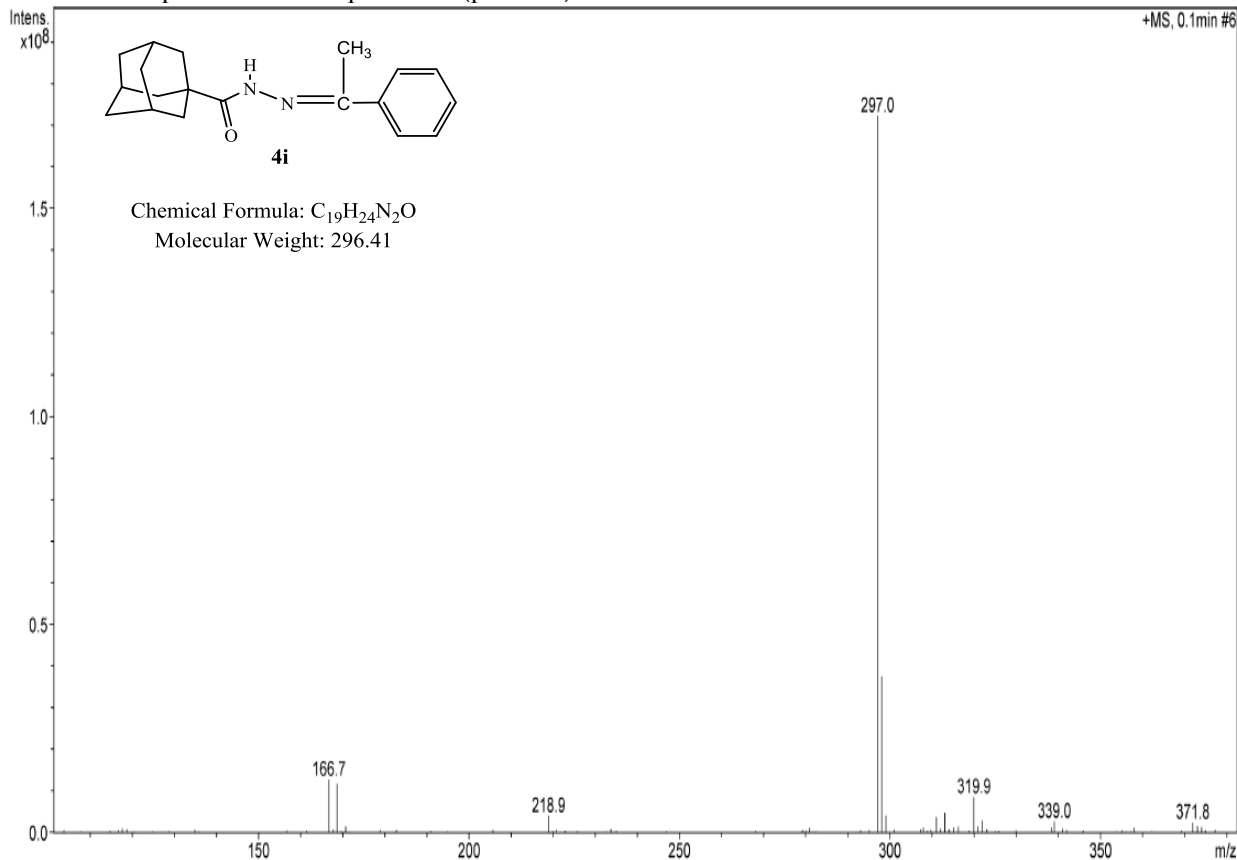

$^1H$ -NMR spectrum of compound **5a**

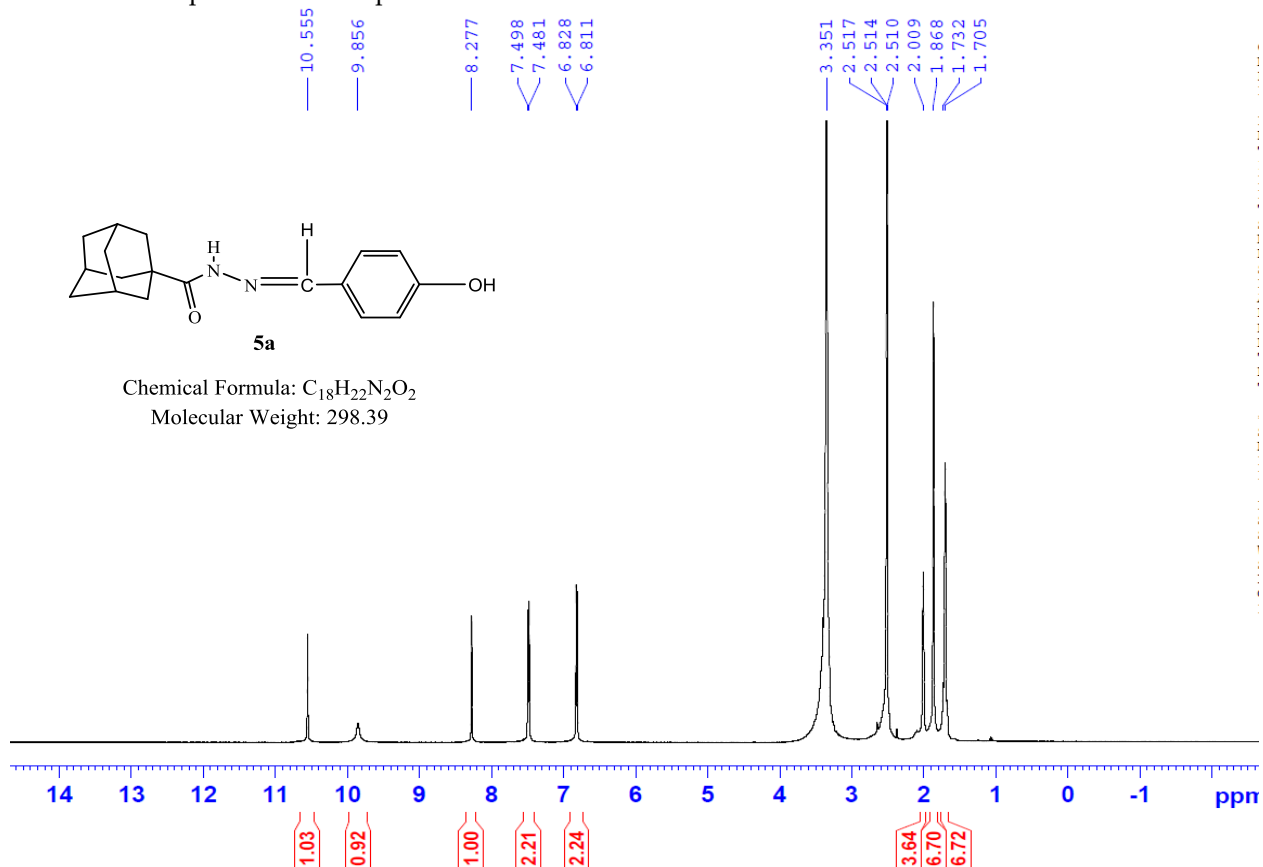

ESI-MS spectrum of compound **5a** (negative)

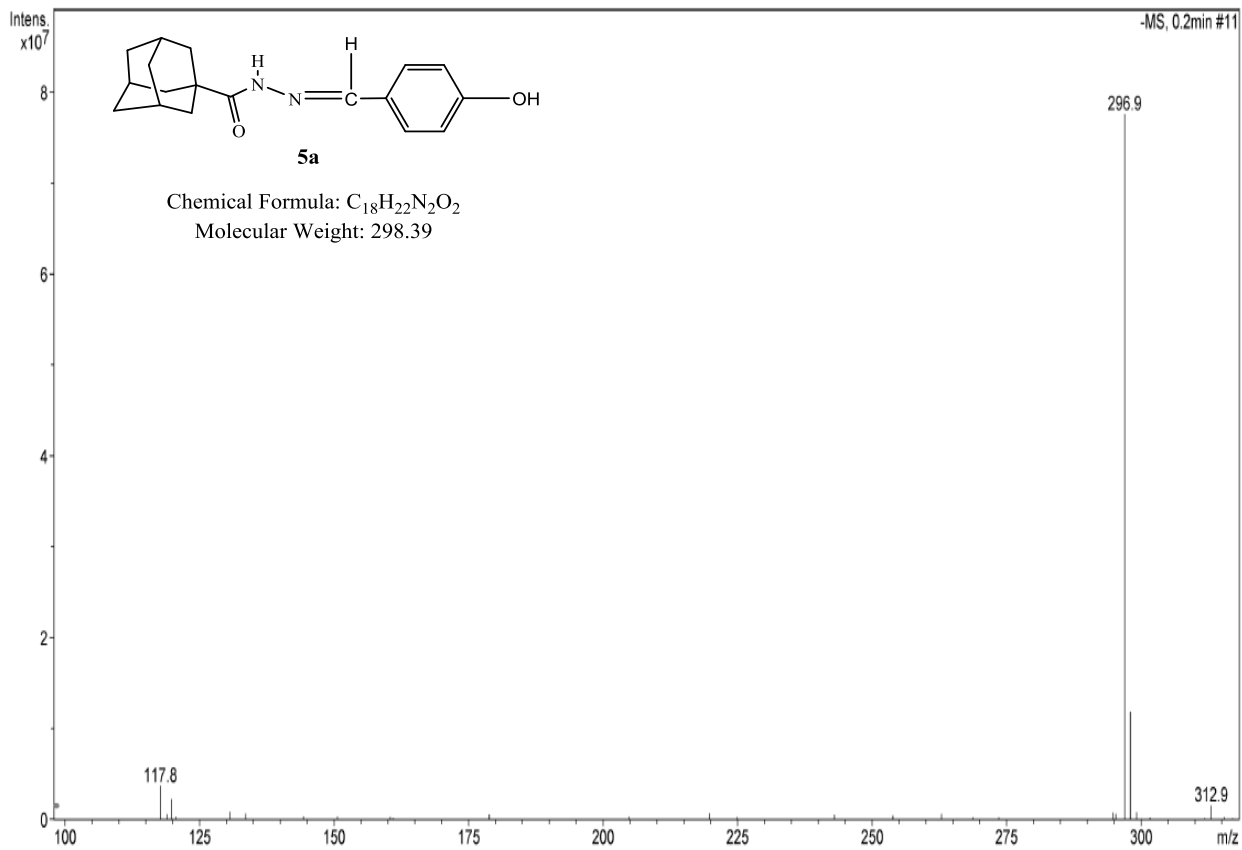

ESI-MS spectrum of compound **5a** (positive)

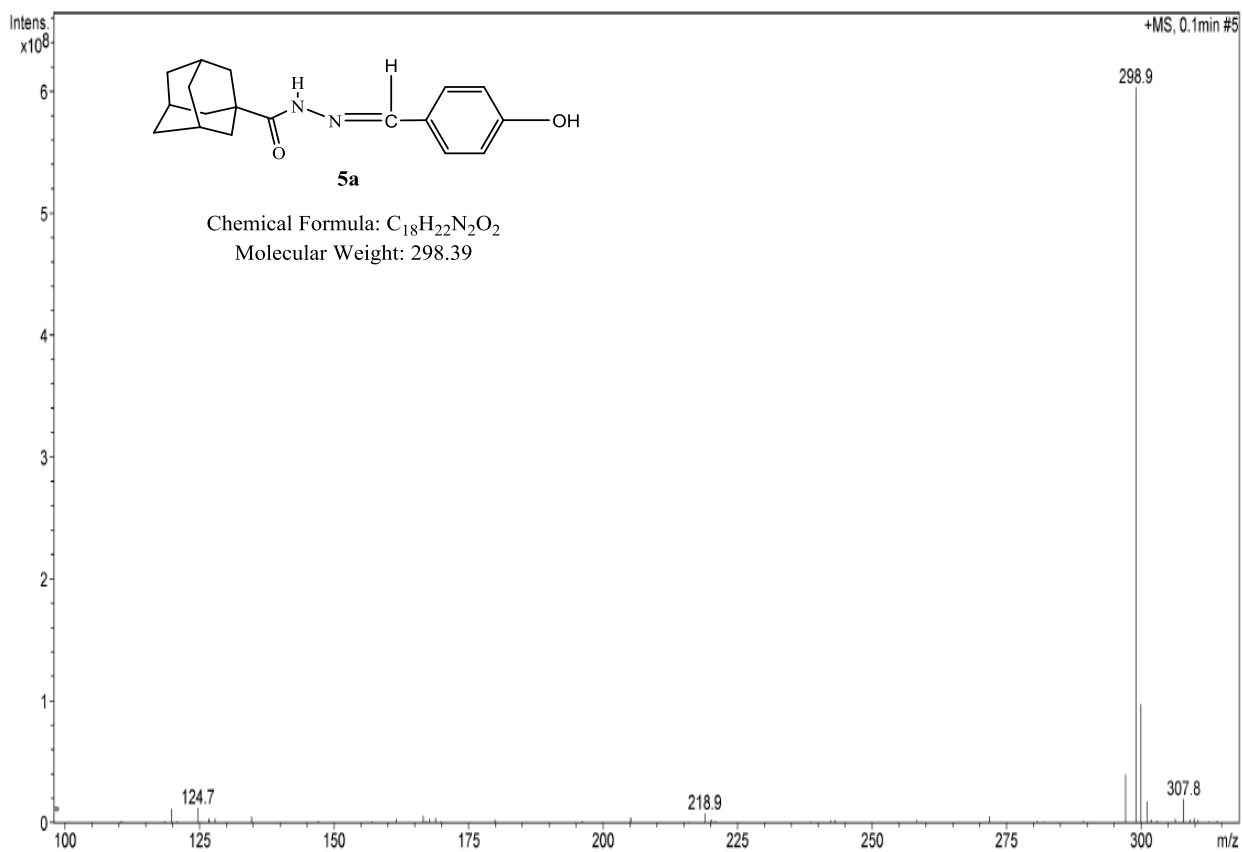

<sup>1</sup>H-NMR spectrum of compound **5c**

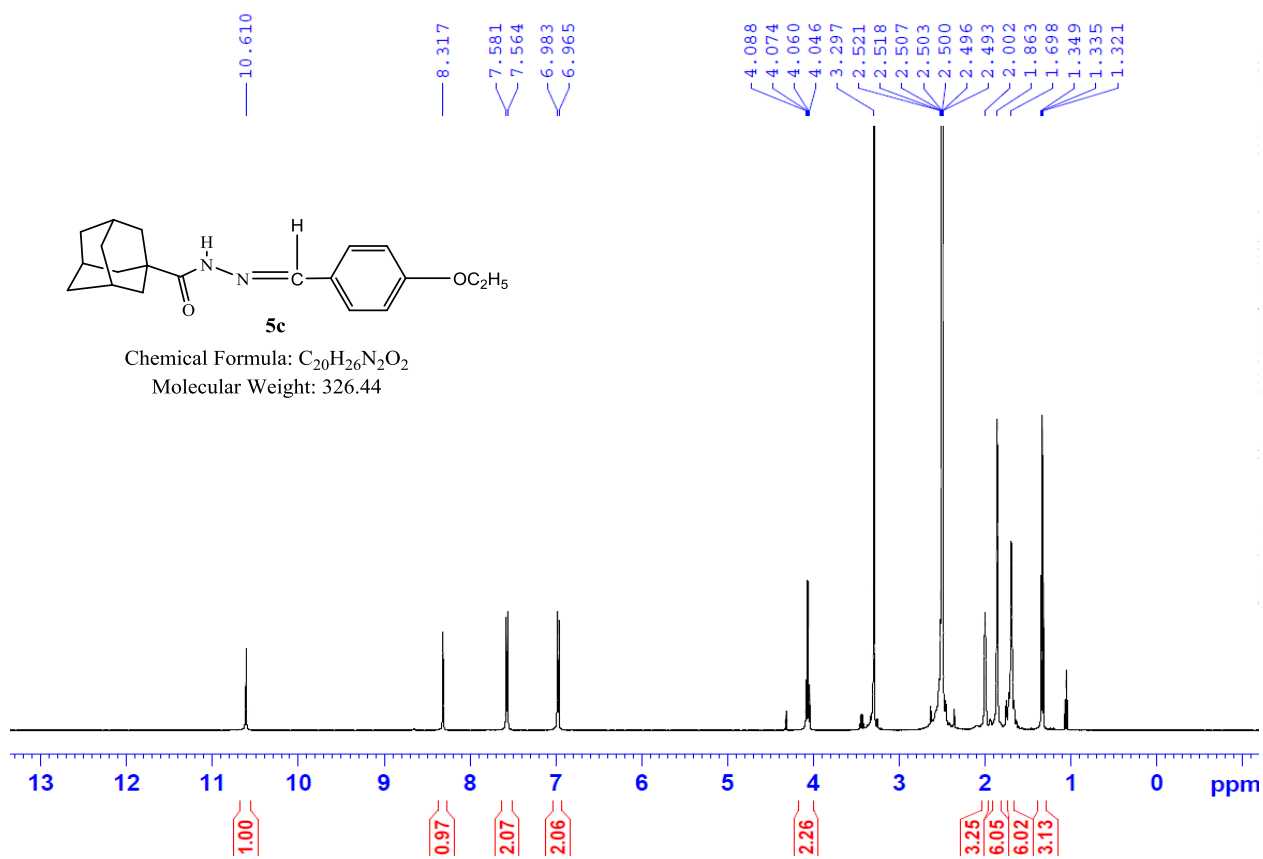

ESI-MS spectrum of compound **5c** (positive)

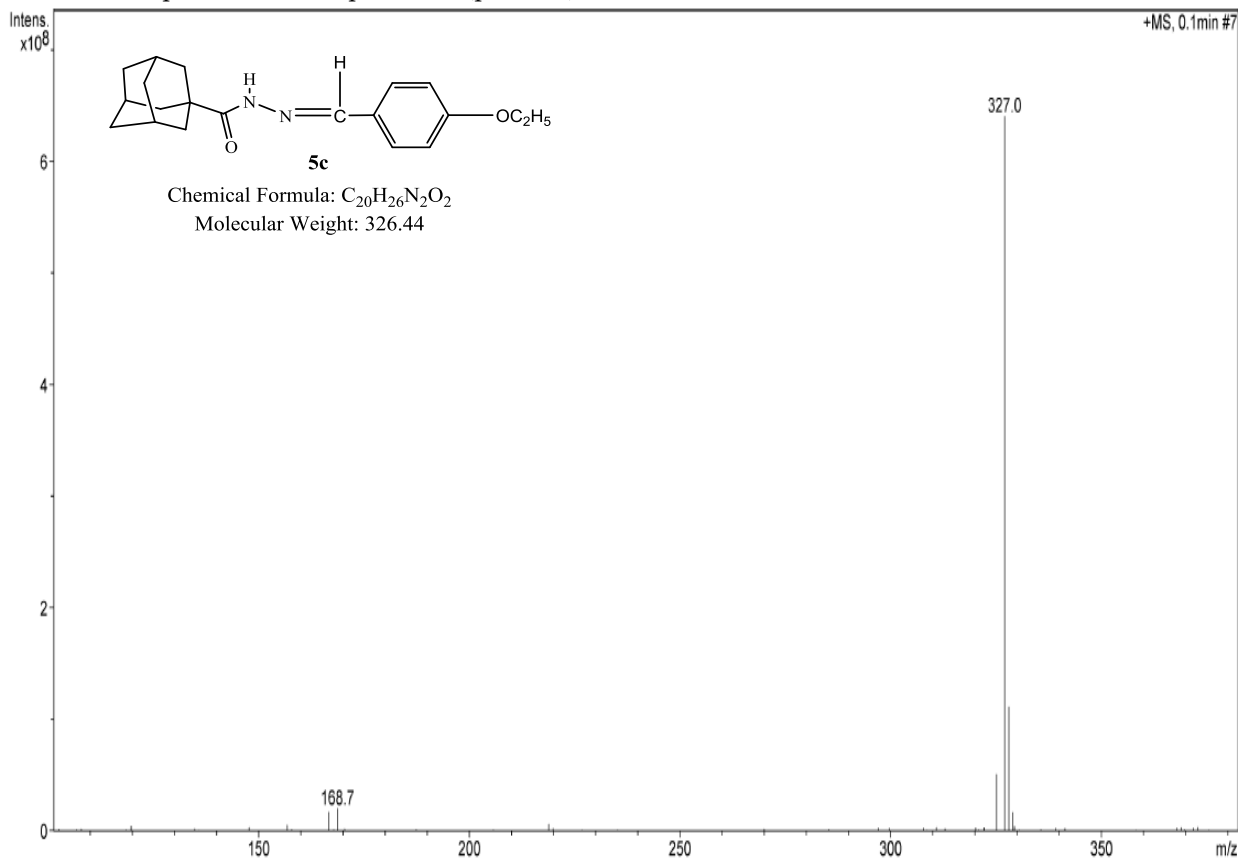

<sup>1</sup>H-NMR spectrum of compound **5e**

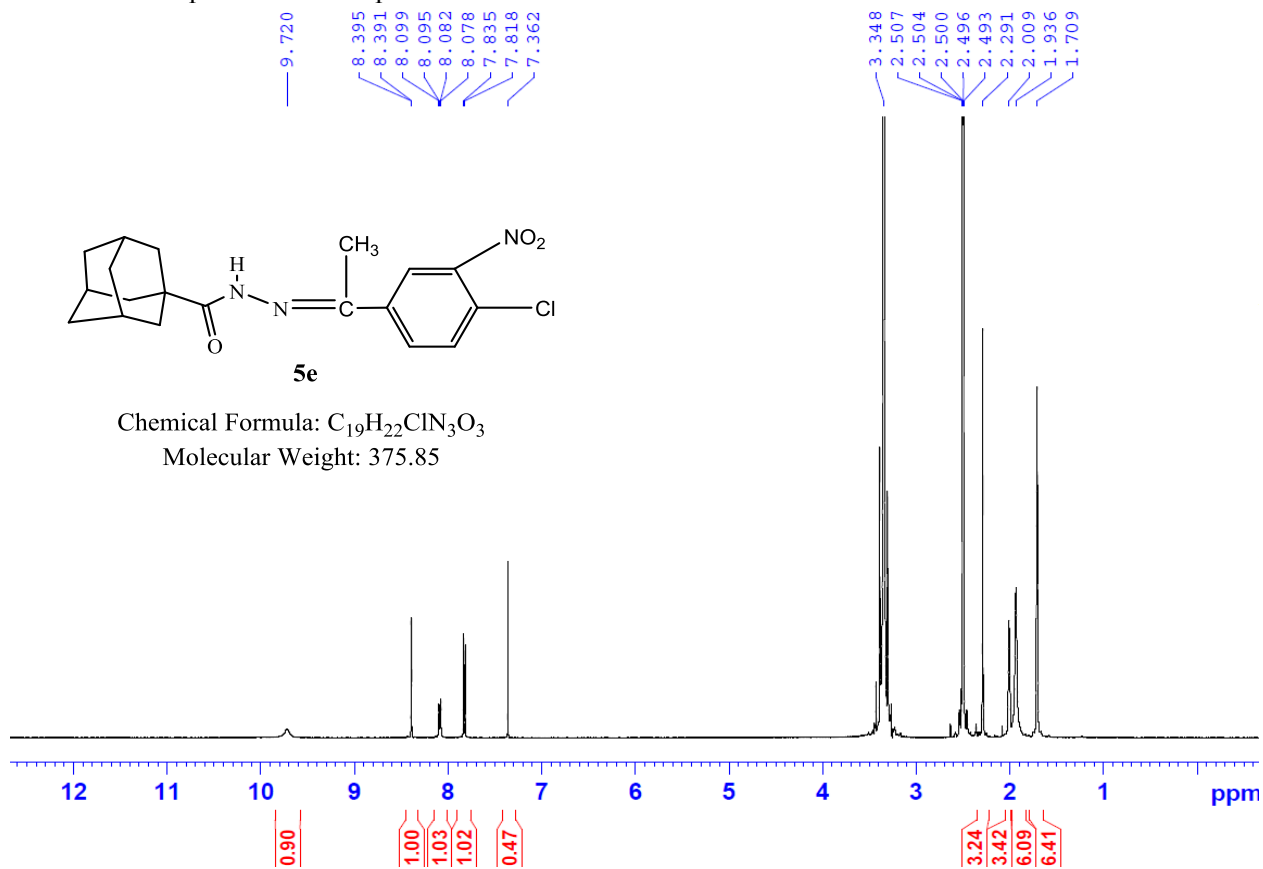

ESI-MS spectrum of compound **5e** (negative)

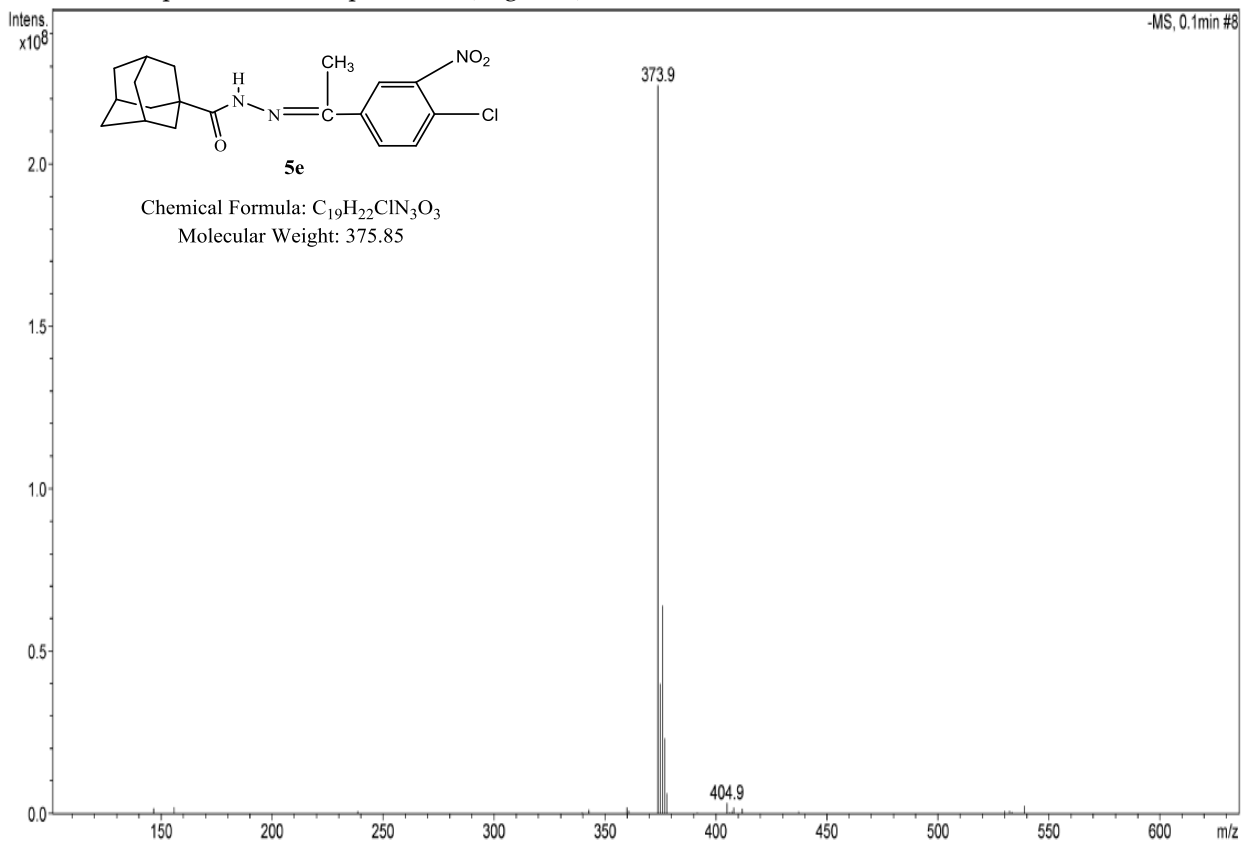

ESI-MS spectrum of compound **5e** (positive)

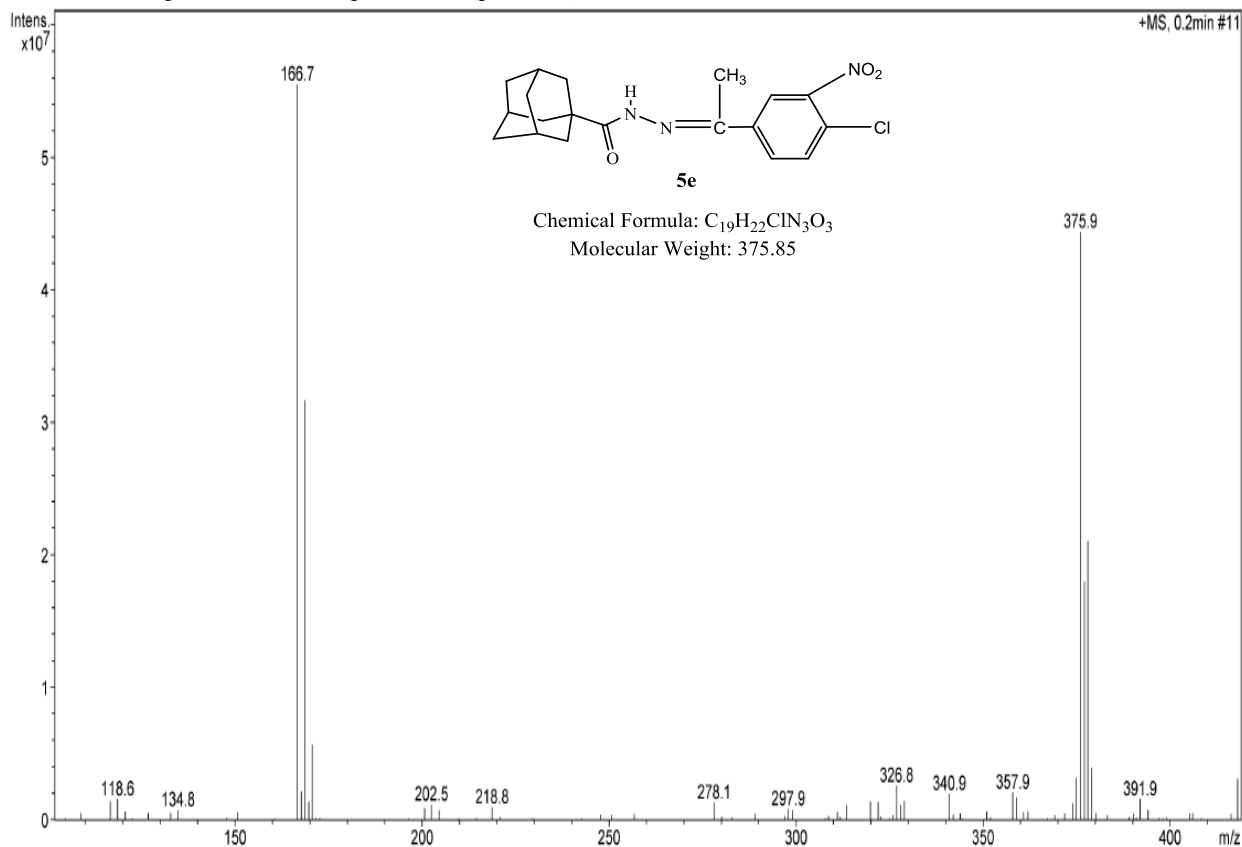

$^1H$ -NMR spectrum of compound **5i**

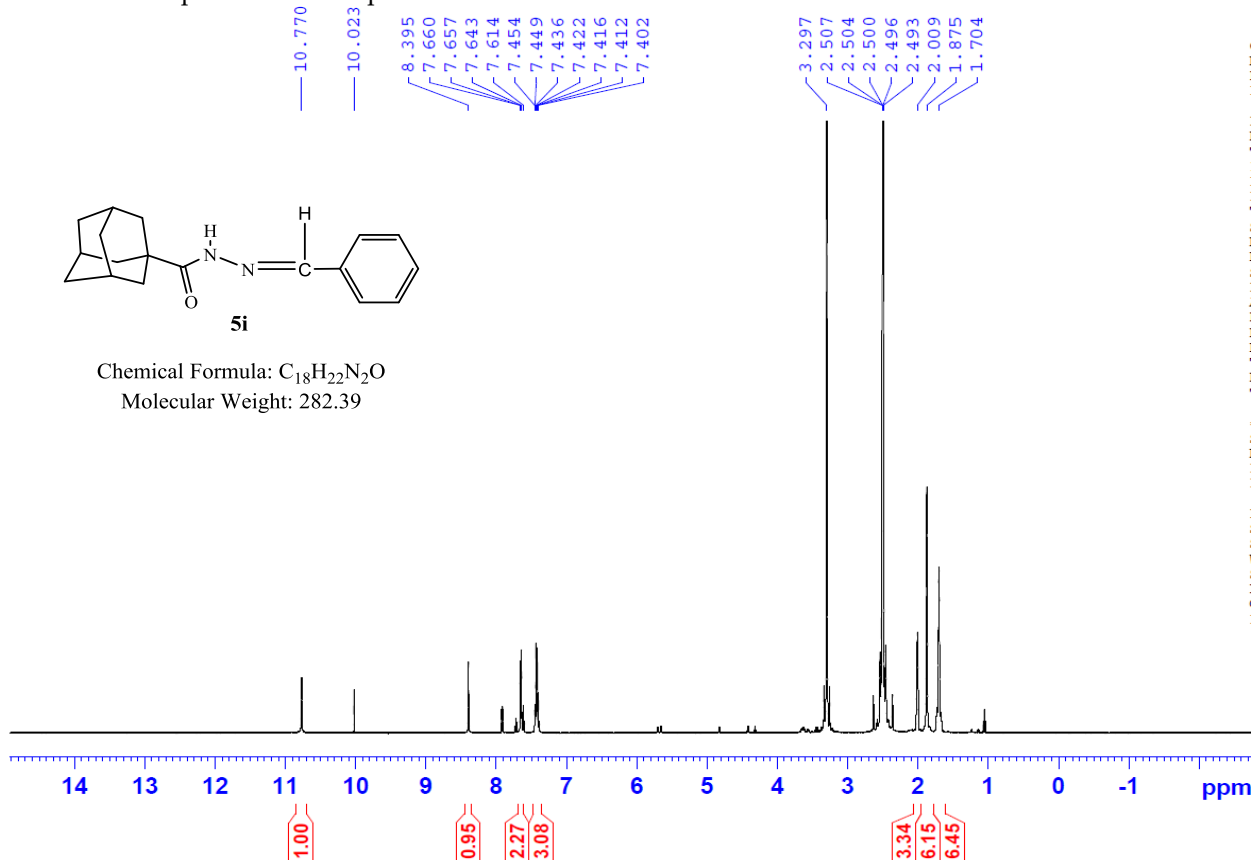

ESI-MS spectrum of compound **5i** (positive)



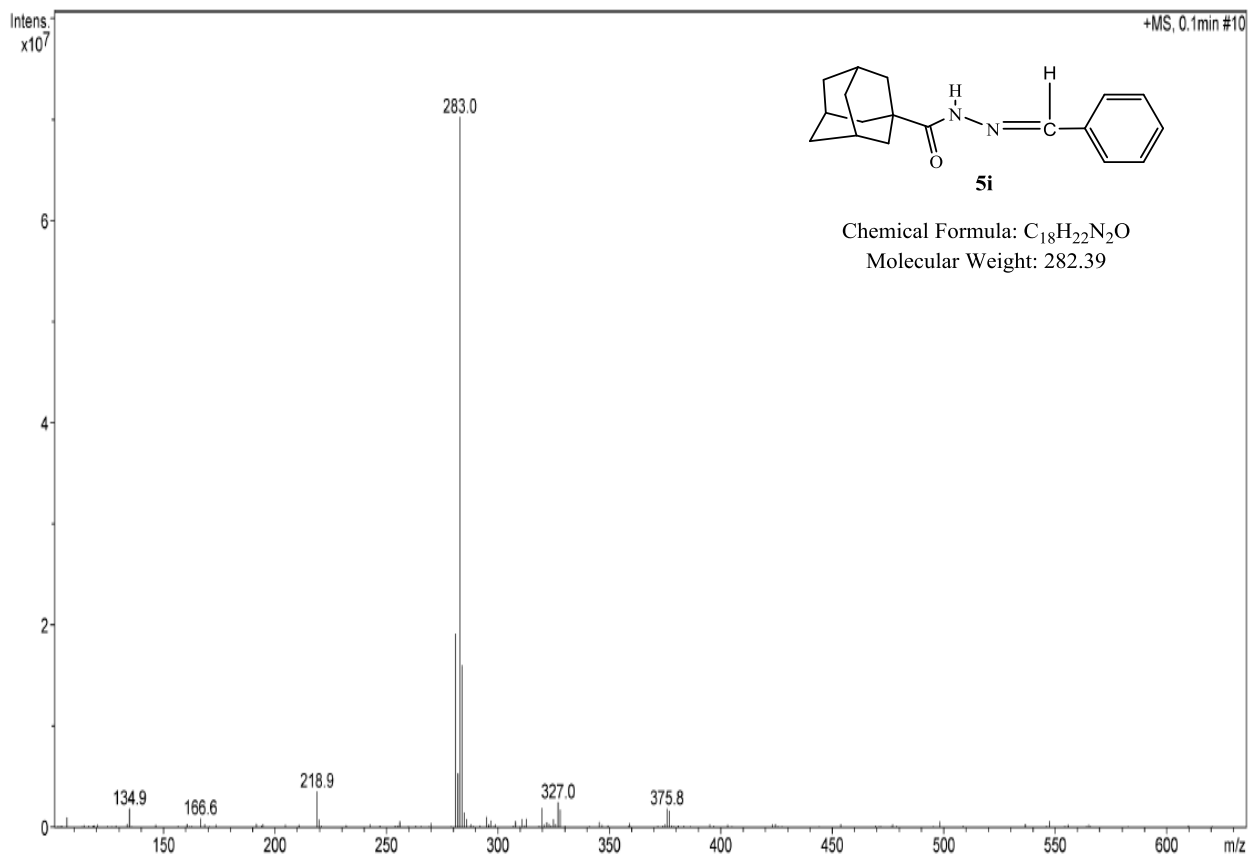

<sup>1</sup>H-NMR spectrum of compound **5j**

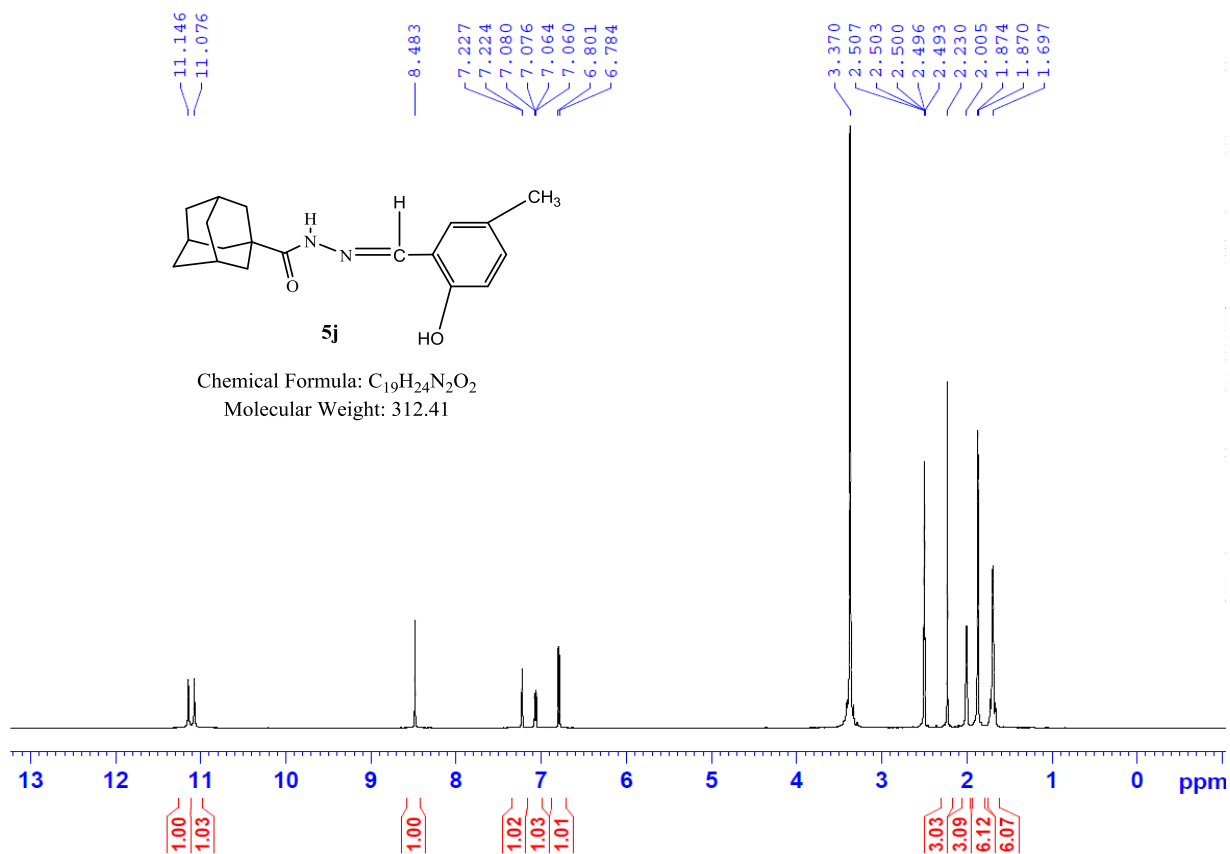

ESI-MS spectrum of compound **5j** (negative)

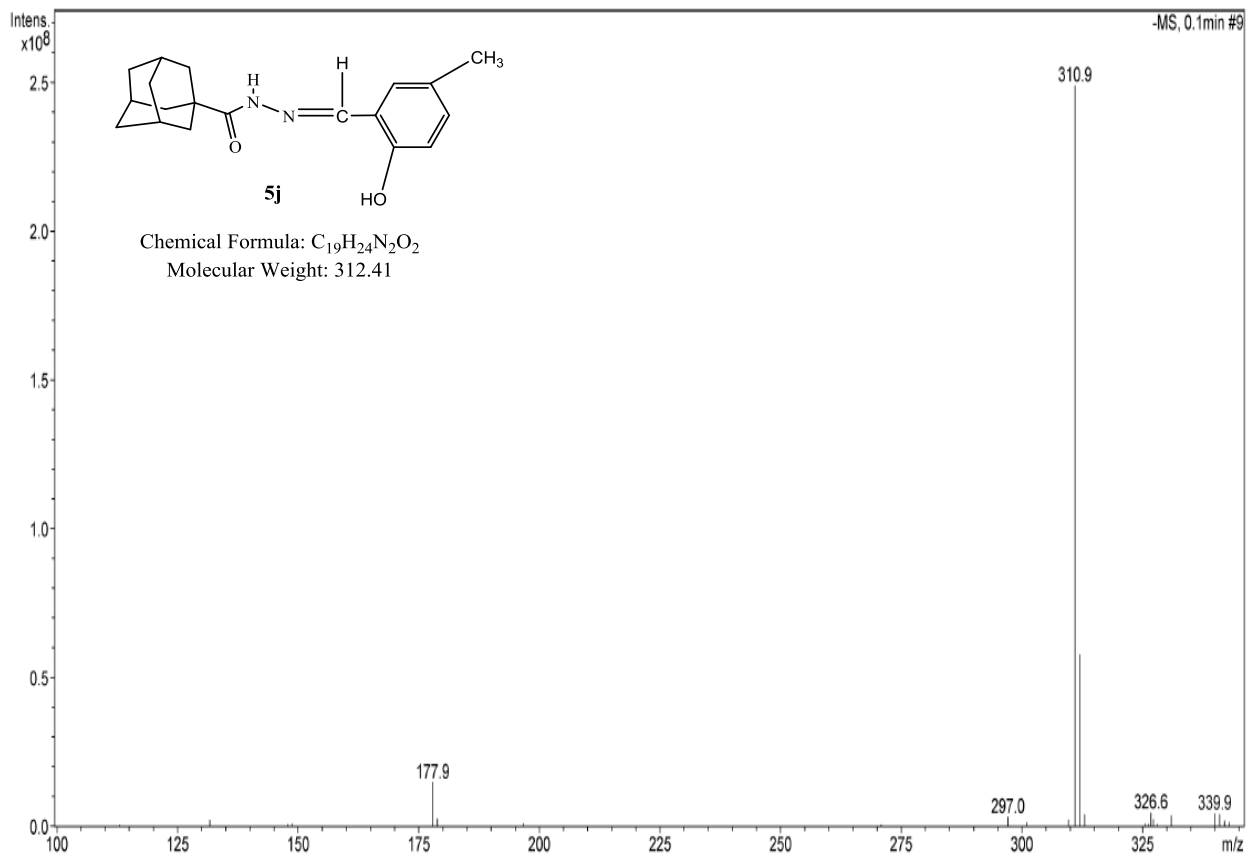

ESI-MS spectrum of compound **5j** (positive)

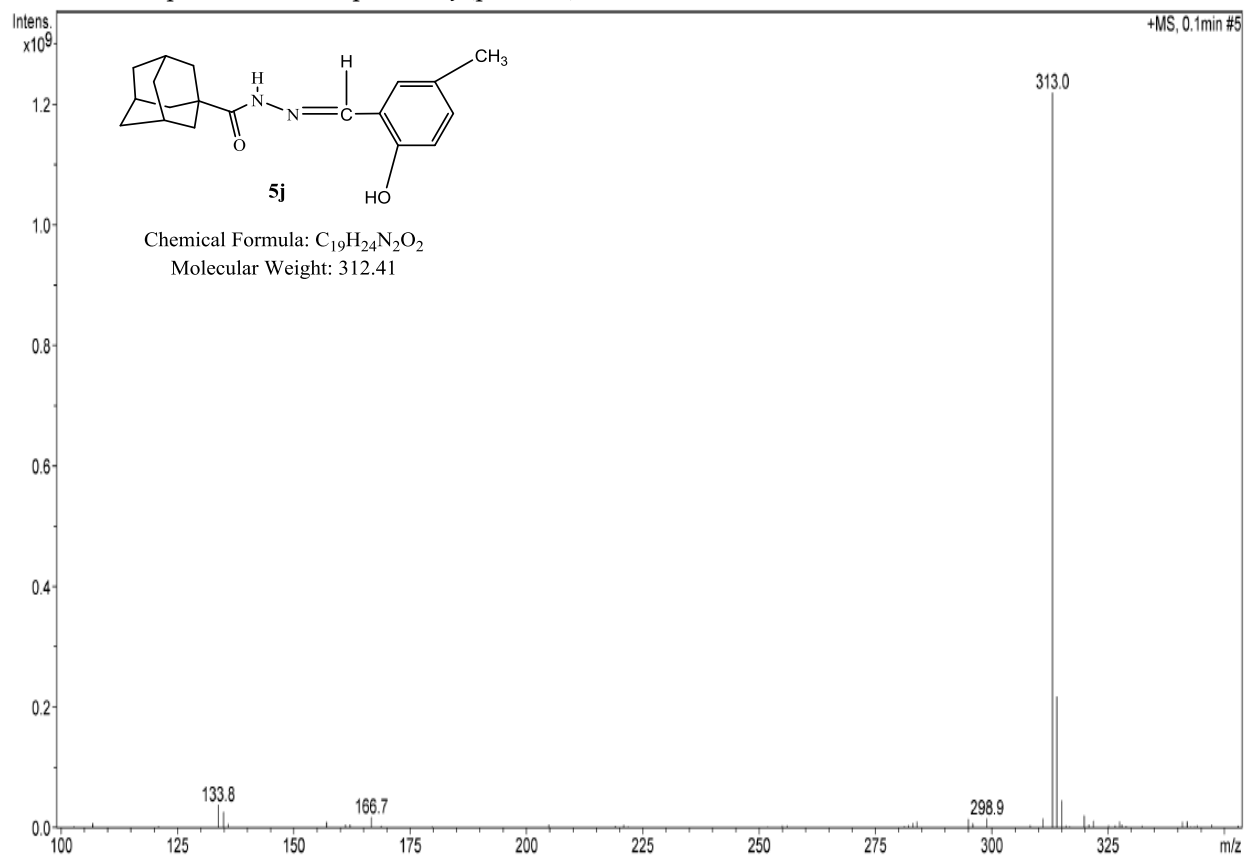

$^1H$ -NMR spectrum of compound **5k**

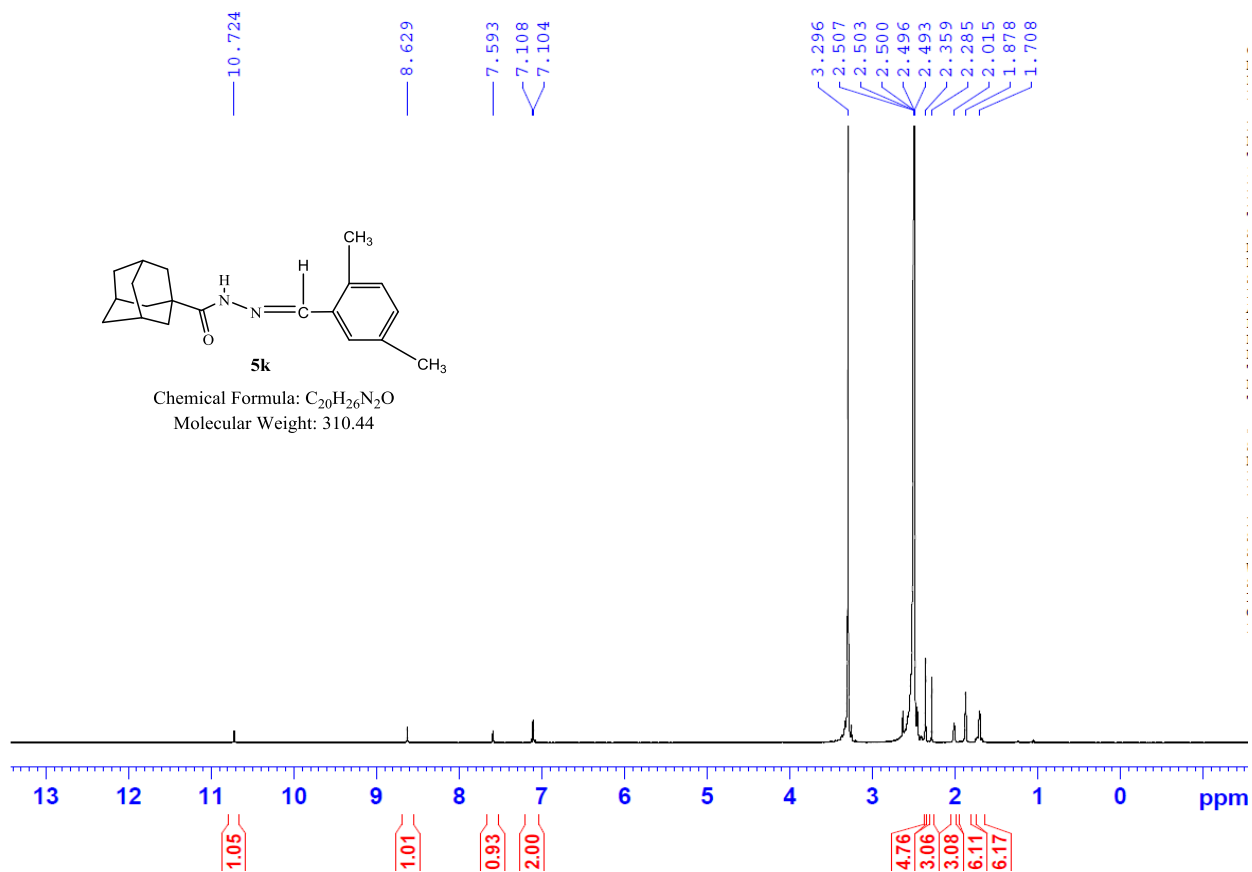

ESI-MS spectrum of compound **5k** (positive)

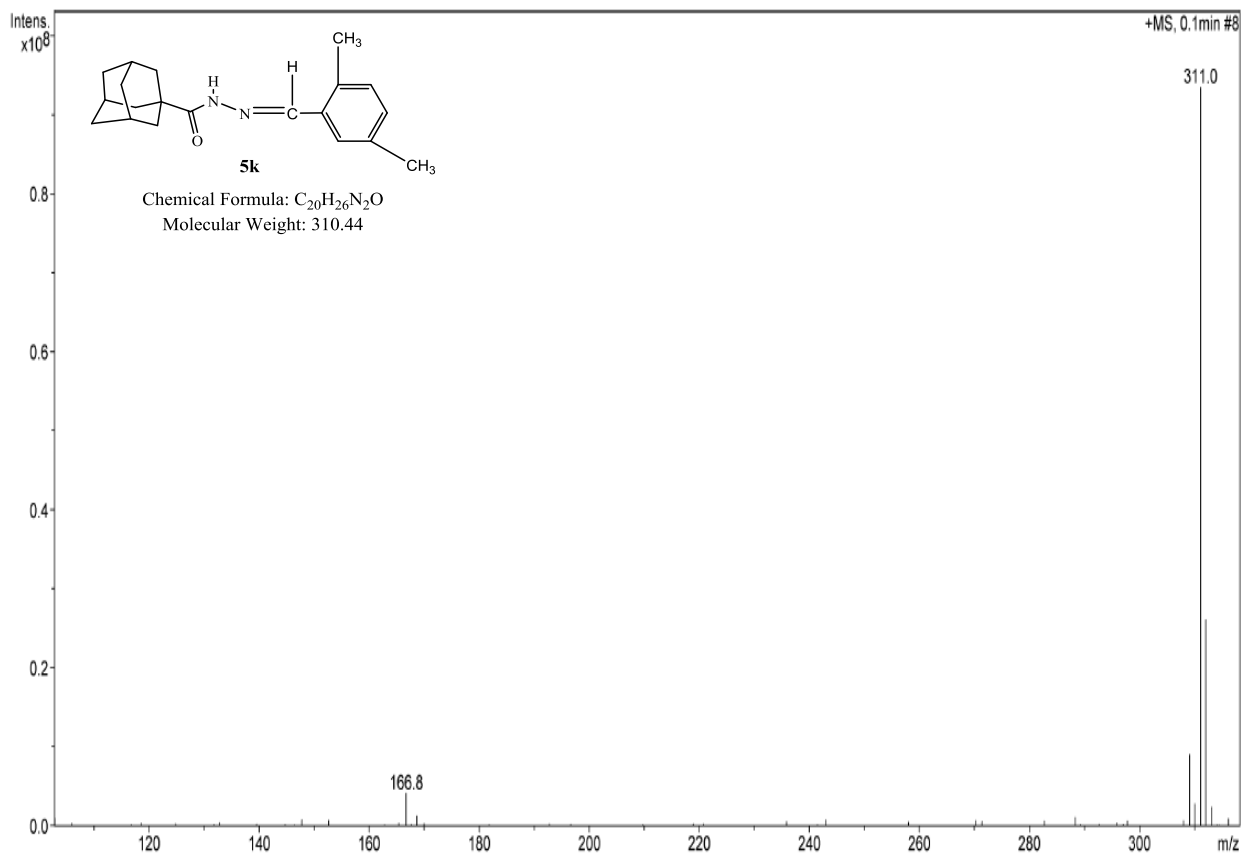

Supplement: molecules-24-04000-s001.pdf [file molecules-24-04000-s001.pdf]
